1 **HNRNPA1 promotes recognition of splice site decoys by U2AF2 in**

2 ***vivo***

3 Jonathan M. Howard<sup>1\*</sup>, Hai Lin<sup>2\*</sup>, Garam Kim<sup>1</sup>, Jolene M Draper<sup>1</sup>, Maximilian Haeussler, Sol  
4 Katzman<sup>3</sup>, Masoud Toulue<sup>4</sup>, Yunlong Liu<sup>2</sup> and Jeremy R. Sanford<sup>1</sup>

5 **Affiliations:**

6 1. Department of Molecular, Cellular and Developmental Biology, University of California Santa  
7 Cruz, 1156 High Street, Santa Cruz CA 95064

8 2. Department of Medical and Molecular Genetics, Indiana University School of Medicine,  
9 Indianapolis, IN 46202, USA

10 3. Center for Biomolecular Science and Engineering, UC Santa Cruz 1156 High Street, Santa  
11 Cruz CA 95064

12 4. Bioo Scientific Corporation, 7500 Burleston Rd, Austin, TX, 78744

13 Correspondence to: [jsanfor2@ucsc.edu](mailto:jsanfor2@ucsc.edu)

14 \*These authors contributed equally.

15 **Email addresses of all authors:** [jomhowar@ucsc.edu](mailto:jomhowar@ucsc.edu), [linhai@uemail.iu.edu](mailto:linhai@uemail.iu.edu), [gkim9@ucsc.edu](mailto:gkim9@ucsc.edu),  
16 [jomdrape@ucsc.edu](mailto:jomdrape@ucsc.edu), [sol@soe.ucsc.edu](mailto:sol@soe.ucsc.edu), [yunliu@iu.edu](mailto:yunliu@iu.edu), [jsanfor2@ucsc.edu](mailto:jsanfor2@ucsc.edu)

17

18

19

20

21 **Abstract**

22 Alternative pre-mRNA splicing plays a major role in expanding the transcript output of human  
23 genes. This process is regulated, in part, by the interplay of *trans*-acting RNA binding proteins  
24 (RBPs) with myriad *cis*-regulatory elements scattered throughout pre-mRNAs. These molecular  
25 recognition events are critical for defining the protein coding sequences (exons) within pre-  
26 mRNAs and directing spliceosome assembly on non-coding regions (introns). One of the  
27 earliest events in this process is recognition of the 3' splice site by U2 small nuclear RNA  
28 auxiliary factor 2 (U2AF2). Splicing regulators, such as the heterogeneous nuclear  
29 ribonucleoprotein A1 (HNRNPA1), influence spliceosome assembly both *in vitro* and *in vivo*, but  
30 their mechanisms of action remain poorly described on a global scale. HNRNPA1 also promotes  
31 proof reading of 3'ss sequences through a direct interaction with the U2AF heterodimer. To  
32 determine how HNRNPA1 regulates U2AF-RNA interactions *in vivo*, we analyzed U2AF2 RNA  
33 binding specificity using individual-nucleotide resolution crosslinking immunoprecipitation  
34 (iCLIP) in control- and HNRNPA1 over-expression cells. We observed changes in the  
35 distribution of U2AF2 crosslinking sites relative to the 3' splice sites of alternative cassette  
36 exons but not constitutive exons upon HNRNPA1 over-expression. A subset of these events  
37 shows a concomitant increase of U2AF2 crosslinking at distal intronic regions, suggesting a shift  
38 of U2AF2 to "decoy" binding sites. Of the many non-canonical U2AF2 binding sites, Alu-derived  
39 RNA sequences represented one of the most abundant classes of HNRNPA1-dependent  
40 decoys. Splicing reporter assays demonstrated that mutation of U2AF2 decoy sites inhibited  
41 HNRNPA1-dependent exon skipping *in vivo*. We propose that HNRNPA1 regulates exon  
42 definition by modulating the interaction of U2AF2 with decoy or *bona fide* 3' splice sites.

43

44 **Keywords:**

45 Alternative splicing - splice site recognition - HNRNPA1 - U2AF

46

## 47 **Introduction**

48           Precursor messenger RNA (pre-mRNA) splicing is catalyzed by a large macromolecular  
49 complex composed of five uridine-rich small nuclear ribonucleoprotein particles (U snRNPs) and  
50 myriad protein factors (Wahl et al. 2009). This process is required to excise intervening  
51 sequences (introns) from the pre-mRNA and ligate protein-coding sequences (exons). The 5'  
52 and 3' ends of introns are defined by nearly invariant GU and AG dinucleotides as well as the  
53 branch point sequence, respectively. Combinatorial protein-RNA interactions play important  
54 roles in defining the splice sites and branch point during spliceosome assembly. The 5' splice  
55 site (GU) is recognized by serine and arginine-rich splicing factors (SR Proteins) and through  
56 base pairing interactions with the U1 snRNP (Eperon et al. 1993; Jamison et al. 1995). Similarly,  
57 the 3' splice site is decoded by a combination of SR proteins and the U2 snRNP auxiliary factor  
58 (U2AF). After early (E) complex assembly, the branch point sequencing is specified through the  
59 interaction of U2AF, Splicing Factor 1/Branchpoint Binding Protein (SF1/BBP) and via base  
60 pairing with the U2 snRNP (Ruskin et al. 1988; Berglund et al. 1997). The responsibility for 3'  
61 splice site recognition is shared by the two subunits of U2AF (Merendino et al. 1999; Wu et al.  
62 1999; Zorio and Blumenthal 1999). The small and large subunit of U2AF, encoded by *U2AF1*  
63 and *U2AF2*, recognize the AG dinucleotide and the upstream polypyrimidine tract, respectively  
64 (Merendino et al. 1999; Wu et al. 1999; Zorio and Blumenthal 1999). These early steps in  
65 spliceosome assembly play critical roles in defining exon-intron boundaries.

66

67           HNRNPA1 is a well-characterized regulator of alternative splicing. One of the primary  
68 functions of HNRNPA1 is to prevent inclusion of specific exons (Mayeda and Krainer 1992;  
69 Caceres et al. 1994; Yang et al. 1994). Several models for HNRNPA1-dependent exon skipping  
70 have been described in the literature. For example, HNRNPA1 can compete with RBPs for  
71 binding to juxtaposed regulatory elements which would be normally occupied by splicing  
72 enhancer proteins such as SRSF1 (Eperon et al. 2000; Zahler et al. 2004). Another potential

73 mechanism involves oligomerization and spreading of HNRNPA1 from an exonic splicing  
74 silencer across a regulated exon, thus antagonizing binding of splicing enhancers and  
75 spliceosomal factors, such as U2AF2 (Zhu et al. 2001; Okunola and Krainer 2009). Finally,  
76 HNRNPA1 binding to intronic splicing silencers on either side of an alternative exon can  
77 dimerize, causing “looping out” of an exon from the pre-mRNA and promote its exclusion from  
78 the final mature transcript (Blanchette and Chabot 1999). A related alternative splicing factor,  
79 PTBP1 also promotes exon skipping via a looping mechanism (Chou et al. 2000; Lamichhane et  
80 al. 2010). Perhaps most relevant to this work, HNRNPA1 promotes proofreading of the 3’ss by  
81 U2AF2. In this case HNRNPA1 enables the U2AF heterodimer to reject suboptimal splice sites  
82 (Tavanez et al. 2012). In light of these diverse molecular mechanisms of HNRNPA1-dependent  
83 splicing regulation, there is a critical need to test their generality on a global scale.

84

85         In this study, we investigate how HNRNPA1 influences the association of U2AF2 with  
86 3’ss on a transcriptome-wide scale. We used individual nucleotide resolution crosslinking  
87 immunoprecipitation (iCLIP) and high throughput sequencing to map U2AF2-RNA interactions in  
88 control or HNRNPA1 over-expression cell lines. This analysis revealed global changes in the  
89 U2AF2-RNA interactions in HNRNPA1 over-expressing cells. These experiments demonstrated  
90 that HNRNPA1 promotes loss of U2AF2 from a subset of 3’ splice sites and the concomitant  
91 increase in U2AF2 crosslinking to intronic decoy sites, including antisense Alu elements.  
92 Splicing reporter assays demonstrated that U2AF2 decoys sites are required for HNRNPA1-  
93 dependent splicing repression in HEK cells. Taken together our data suggest the intriguing  
94 hypothesis that HNRNPA1 regulates alternative splicing by altering competition between bona  
95 fide 3’ss and decoy sites for U2AF2 binding. Additionally, we discovered a role for mobile  
96 U2AF2 decoy sites in splicing regulation, suggesting that Alu elements can play a major role in  
97 the evolution of novel alternative splicing events.

98



## 100 **Results**

101           To determine how HNRNPA1 influences the association of U2AF2 with 3' splice sites on  
102 a global scale, we established an HNRNPA1-inducible expression system in HEK293 cells. We  
103 then assayed U2AF2 and HNRNPA1 protein-RNA interactions in control or HNRNPA1 over-  
104 expression cells using individual nucleotide resolution crosslinking immunoprecipitation and high  
105 throughput sequencing (iCLIP-seq) (Konig et al. 2010). We favored the over-expression  
106 approach because HNRNPA1 protein levels are elevated in many human cancers (Pino et al.  
107 2003; Ushigome et al. 2005; Chen et al. 2010; Loh et al. 2015; Yu et al. 2015). Induction of  
108 HNRNPA1 results in an approximately 2 fold increase compared to the endogenous protein  
109 (and relative to EWSR1) and has no appreciable effect on SRSF1 or U2AF2 steady state  
110 protein levels (Fig. 1A). Additionally, the expression and localization of hnRNPC are unaffected  
111 by HNRNPA1 over-expression (Supplemental Fig. 1). We used iCLIP to purify HNRNPA1-,  
112 SRSF1-, and U2AF2-RNA complexes from control and HNRNPA1 over-expressing cells (Fig.  
113 1B and supplemental Fig 2A and B). In all cases, the immunoprecipitated material was both UV-  
114 and antibody-dependent, nuclease sensitive and produced robust sequencing libraries  
115 (Supplemental Tables 1-3).

116

117           After identification of binding site peaks using CLIPper (Lovci et al. 2013) (Supplemental  
118 Table 4), we observed differences in the distribution of U2AF2 peaks across genomic locations  
119 between control and HNRNPA1 over-expression cell lines (Fig. 1C). Most notably, the  
120 proportion of peaks located in coding exons (CDS) or in exon-proximal intronic regions was  
121 reduced whereas intronic peaks located more than 500 nt from exons (distal intron) increased.  
122 A similar trend was observed for SRSF1 peaks (Supplemental Fig. 2).

123

124 To determine whether HNRNPA1 over-expression influences the RNA binding specificity  
125 of U2AF2, we searched for over-represented RNA sequences within the binding site peaks (Fig.  
126 1D). In both control cells and HNRNPA1 over-expression cells, U2AF2 peaks are characterized  
127 by a pyrimidine-rich motif, closely resembling authentic 3' splice sites. Although the sequences  
128 are distinct from each other, SRSF1 and HNRNPA1 motifs also appear to be similar between  
129 control and HNRNPA1 over-expression cells (Supplemental Figs. 2A and B). These data  
130 suggest that over-expression of HNRNPA1 alters U2AF2 RNA-targeting with only modest effect  
131 on sequence specificity.

132

133 HNRNPA1 influences association of splicing factors such as U2AF2 with 3' splice sites  
134 (Zhu et al. 2001; Tavanez et al. 2012). To test this hypothesis, we determined how titration of  
135 HNRNPA1 affected the distribution of SRSF1- and U2AF2-RNA cross-links relative to 3' splice  
136 sites of constitutive or alternative cassette exons. As suggested by the peak analysis  
137 (Supplemental Fig. 3), there are no differences in HNRNPA1 crosslinking sites between control  
138 and over-expression cells (Supplemental Fig 4A and B, left panels, blue and red lines  
139 respectively). SRSF1 crosslinking to exonic sequences was modestly reduced in the HNRNPA1  
140 over-expression cells compared to control, but the positional distribution of the SRSF1 sites  
141 relative to the 3'ss was largely unchanged for constitutive and skipped exons (Supplemental Fig  
142 4A and B right panels, blue and red lines, respectively). U2AF2 crosslinking distribution relative  
143 to the 3'ss was substantially altered in HNRNPA1 over-expressing cells compared to the  
144 control, where a characteristic peak is observed over the 3'ss of both constitutive and skipped  
145 exons (Fig. 2A and B, blue line). By contrast, in cells overexpressing HNRNPA1, U2AF2  
146 crosslinking density near alternative exons shifts downstream of the 3'ss and the peak is  
147 substantially reduced (Fig. 2B right panel, red line). To further determine if there is a direct  
148 relationship between HNRNPA1 binding and changes in U2AF2 or SRSF1 association with  
149 transcripts, we examined regions flanking the 3'ss of skipped exons with HNRNPA1 crosslinking

150 in either condition (Fig. 2C; Supplemental Fig 4, Supplemental Tables 5 and 6). In regions with  
151 no detectable HNRNPA1 crosslinks, the change in U2AF2 crosslinking exhibits a bimodal  
152 distribution, which corresponds to regions flanking the 3'ss that show either increased or  
153 decreased U2AF2 crosslinking in HNRNPA1 over-expression cells relative to control cells (Fig.  
154 2C, blue). By contrast, U2AF2 crosslinking to the vicinity of the 3'ss is significantly reduced  
155 when a direct association of HNRNPA1 is also evident (Fig. 2C, pink). For example, in both  
156 SRSF6 (serine/arginine-rich splicing factor 6 or SRp55) and PIEZO1 (Piezo-type  
157 mechanosensitive ion channel component 1) we found that U2AF2 crosslinking near the 3'  
158 splice sites is reduced in the cell lines over-expressing HNRNPA1 (Supplemental Figure 5).  
159

160 To determine if changes in U2AF2 crosslinking correlated with HNRNPA1-dependent  
161 splicing regulation, we sequenced poly-A<sup>+</sup> selected RNA libraries from control and HNRNPA1  
162 over-expression cells (supplemental table 7). Of the 267 HNRNPA1-regulated cassette exons,  
163 the majority exhibited increased levels of exon skipping upon HNRNPA1 over-expression (Fig.  
164 3A, Supplemental Table 8). 83 of the 267 differentially spliced exons also had detectable U2AF2  
165 crosslinking in either cell line. Of those 83 exons, ~90% exhibited an HNRNPA1-dependent  
166 increase in exon skipping compared to ~70% of exons with no detected U2AF2 crosslinking  
167 (Table 1,  $P < 0.0025$ , Fishers Exact Test). ~54% (44/83) of HNRNPA1-regulated splicing  
168 events also exhibited changes (<2 fold) in U2AF2 intronic crosslinking (Table 2 and  
169 Supplemental Table 5 and 6), whereas 46% show HNRNPA1-dependent increases in U2AF2  
170 crosslinking in the same region. Many of these HNRNPA1-sensitive exons exhibited  
171 redistribution of U2AF2 signal from near 3'ss to distal, upstream crosslinking sites, suggesting  
172 their possible function in HNRNPA1-mediated splicing regulation (Figure 3E and Supplemental  
173 Figs. 6-16). We use transient transfection of T7 epitope tagged HNRNPA1 and RT-PCR to  
174 validate several endogenous splicing events exhibiting HNRNPA1-dependent reduction in



175 U2AF2-3'ss crosslinking (Fig. 3B-D, upper panels). As expected, we observed a significant  
176 reduction in exon inclusion for ACIN1, SRSF6 and TRNAU1AP in HNRNPA1 over-expression  
177 cells relative to control (Fig. 3B-D, lower panels).

178 To determine if non-canonical U2AF2 binding sites are involved in HNRNPA1-dependent  
179 exon skipping we created matched pairs of beta-hemoglobin-based (*HBB1*) splicing reporter  
180 gene constructs (Rothrock et al. 2003) containing the wild-type or mutated intronic elements  
181 upstream of the HNRNPA1-sensitive exons found in the *SRSF6* pre-mRNA (Fig. 3E). The  
182 *SRSF6* splicing reporter constructs were co-transfected into HEK293T cells with epitope-tagged  
183 HNRNPA1 expression plasmid or a control plasmid (Fig. 3F). Because inclusion of the test  
184 exons may induce nonsense-mediated decay (NMD) by inducing an in-frame premature  
185 termination codon (PTC), as is the case with SRSF6 we assayed splicing in the presence of the  
186 translation inhibitor emetine dihydrochloride, a potent inhibitor of NMD *in vivo* (Noensie and  
187 Dietz 2001; Lareau et al. 2007; Ni et al. 2007). As shown in Fig. 3G, RT-PCR of wild-type  
188 *SRSF6* splicing reporters show expected increases in exon skipping in response to HNRNPA1  
189 over-expression compared to endogenous levels. Deletion of the distal intronic U2AF2 binding  
190 site attenuated HNRNPA1-dependent exon skipping. Quantification of amplicon ratios  
191 demonstrated that mutation of the putative HNRNPA1-induced U2AF2-associated intronic  
192 elements disrupt splicing sensitivity to HNRNPA1 over-expression (Fig. 3H ;  $P < 0.0228$   
193 respectively, ratio paired T-test).

194 Previous work by Zarnack et al. demonstrated that hnRNP proteins, such as hnRNP C,  
195 can antagonize binding of U2AF2 to antisense *Alu* elements, to repress their exonization  
196 (Zarnack et al. 2013). We asked if HNRNPA1 similarly repressed U2AF2 crosslinking to  
197 antisense *Alu* elements by measuring the global distribution of crosslinks for each protein  
198 overlapping of antisense *Alu* elements throughout intronic regions with titration of HNRNPA1  
199 levels. Surprisingly upon over-expression of HNRNPA1, we detected a dramatic increase in

200 U2AF2 crosslinking to antisense Alu-containing RNA transcripts compared to control cells (Fig  
201 4A). To visualize HNRNPA1-dependent accumulation of U2AF2 in Alu elements we calculated  
202 the coverage of all peaks across a consensus sequence assembled from all the Alu subtypes in  
203 the human genome (see methods). For example, for subtype *AluSc*, HNRNPA1 over-expression  
204 induces U2AF2 crosslinking near the 3' end of the element compared to control cells (Fig. 4B).  
205 Conversely, HNRNPA1 crosslinking globally decreases over Alu elements with over-expression  
206 (Supplementary Fig 17A,C). By contrast to U2AF2, crosslinking of SRSF1 to antisense Alu  
207 elements shows no appreciable changes (Supplementary Fig. 17 B,C), suggesting that the  
208 effect of HNRNPA1 is specific to U2AF2.

209

210 To determine if Alu elements exhibiting HNRNPA1-dependent increases in U2AF2  
211 crosslinking are located in *cis*- relative to annotated skipped exons (Alu elements upstream or  
212 downstream of a splicing event) or in *trans*- (another locus, Fig. 4C), we compared the  
213 proportion of U2AF2 crosslinks within Alu-elements relative to flanking sequences across  
214 individual exon skipping events in control or HNRNPA1 over-expression cells. The scatter plot  
215 shown in Fig 4D (data in Supplemental Tables 9 and 10), demonstrates that the proportion of  
216 U2AF2 crosslinks present in Alu elements increases significantly across virtually all exon  
217 skipping events, upon HNRNPA1 over-expression, whereas the proportion of HNRNPA1  
218 crosslinks are decreased (Supplemental Fig. 17D; data in Supplemental Tables 11 and 12). By  
219 contrast, the proportion of SRSF1 crosslinks to Alu elements is refractory to changes in  
220 HNRNPA1 expression levels (Supplemental Fig. 17E; data in Supplemental Tables 13 and 14).  
221 These data demonstrate a global change in U2AF2-Alu association and refute the hypothesis  
222 that a few spurious Alu-elements are responsible for the signal observed in Fig 4A. To  
223 determine if *cis*-Alu elements are involved in HNRNPA1-regulated alternative splicing we  
224 manually curated the list of 83 splicing events that also had detectable U2AF2 crosslinking. We

225 found that 41% of HNRNPA1-dependent exon skipping events exhibited redistribution of U2AF2  
226 to adjacent Alu elements (Table 1). Taken together, these data demonstrate that over-  
227 expression of HNRNPA1 influences the association of U2AF2 with antisense Alu elements,  
228 which may contribute to splicing regulation.

229 Alu elements influence alternative splicing, although the mechanisms are poorly  
230 understood (Sorek et al. 2002; Lev-Maor et al. 2008; Gal-Mark et al. 2009; Schwartz et al. 2009;  
231 Pastor and Pagani 2011). Splicing regulatory elements often exhibit position-dependent and  
232 context-dependent functions (Fu and Ares 2014). To determine if Alu-elements with HNRNPA1-  
233 dependent changes in U2AF2 crosslinking exhibit positional bias we measured their distance  
234 relative to the 3' splice site of constitutive or skipped exons. In general, we observed that Alu  
235 elements are closer to skipped than constitutive exons ( $P < 1.4e-47$ , Wilcoxon rank-sum test,  
236 Fig. 4E, compare blue and orange boxes). But yet, those Alu elements with HNRNPA1-  
237 dependent increases in U2AF crosslinking are significantly closer to exons than those that are  
238 unchanged ( $P < 9.5e-93$ , Fig 4E). Taken together our data suggest the intriguing hypothesis  
239 that Alu-elements may function as *cis*-regulatory elements that compete with authentic exons for  
240 binding to splicing factors.  
241

## 242 Discussion

243 HNRNPA1 represses splicing through diverse mechanisms. Our data suggest that  
244 HNRNPA1 alters the competition between bona fide and decoy 3' splice sites. Because  
245 HNRNPA1 forms a ternary complex with U2AF and the 3'ss, HNRNPA1-dependent  
246 redistribution of U2AF2 from bona fide splice sites to "decoy" sites might arise from direct  
247 competition for these splicing factors at 3' splice sites. In cells overexpressing HNRNPA1 we  
248 observed a pronounced shift in U2AF2 binding sites relative to control cells. Based on U2AF2  
249 peak distributions, this HNRNPA1-dependent redistribution involves loss of proximal-intron and  
250 recognition of distal-intronic peaks (Fig. 1). A similar pattern was observed at the single  
251 nucleotide level where U2AF2 crosslinking density near alternative 3' splice sites was reduced  
252 in HNRNPA1 over-expression cells and distributed across exons (Fig. 2). Despite evidence for  
253 global changes in U2AF2 binding position, we found nearly identical sequence motifs enriched  
254 at peaks in both cell lines suggesting little, if any, differences in U2AF2 RNA binding specificity  
255 (Fig. 1). Splicing reporter assays revealed that upstream polypyrimidine tracks identified by  
256 iCLIP were necessary for HNRNPA1-dependent splicing regulation (Fig. 3). These data also  
257 support the hypothesis that distant U2AF2 binding sites are likely to function as splice site  
258 decoys that contribute to HNRNPA1-dependent splicing silencing.

259 Our findings are well-aligned with a recent census of U2AF2 binding sites in HeLa cells,  
260 which documented a position-dependent code for U2AF2 in splicing regulation (Shao et al.  
261 2014). Perhaps most relevant to the work presented here is their observation that non-canonical  
262 U2AF2 binding sites located upstream or within alternative exons correlates with exon skipping  
263 (Shao et al. 2014; Cho et al. 2015). Our results suggest a role for HNRNPA1 in promoting  
264 recognition of non-canonical sites by U2AF2. Our data (Supplemental Fig 5), as well as protein-  
265 protein interaction screens (Akerman et al. 2015), argue against a direct interaction between  
266 HNRNPA1 and U2AF2. One potential model to explain our results is that HNRNPA1 and the

267 U2AF heterodimer compete for binding to the 3'splice site, resulting in displacement of U2AF  
268 (Zhu et al. 2001; Okunola and Krainer 2009; Jain et al. 2017). Alternatively, the interaction of  
269 HNRNPA1 with nearby positions may alter RNA conformation thereby interfering with U2AF-  
270 3'ss association.

271 The results presented here may also illuminate the role of HNRNPA1 and U2AF in  
272 proofreading of the 3'ss (Tavanez et al. 2012). Tavarnez et al demonstrated the HNRNPA1 is  
273 required for discrimination of AG and CG dinucleotides at 3'splice sites. HNRNPA1 enables  
274 U2AF to ignore the non-canonical CG-containing splice sites but to productively engage AG-  
275 containing splice sites. We observed a global decrease in U2AF2 crosslinking near alternative  
276 3'ss, but little change near constitutive splice sites. Given that alternative exons are typically  
277 flanked by weak splice sites, it is possible that this proof reading mechanism also contributes to  
278 regulation of alternative splicing. Tavarnez et al. also noted that depletion of HNRNPA1 from  
279 HeLa cells resulted in increased U2AF association at spurious sites, suggesting a lack of  
280 fidelity. Their work identified several sites within the 3'UTRs of intronless messages that  
281 accumulate U2AF when HNRNPA1 is knocked down. We also observed a global increase in  
282 U2AF2 crosslinking to 3'UTRs but not CDS regions when HNRNPA1 is over expressed  
283 (supplemental table 3). It will be important to understand the RNA determinants (sequence,  
284 structure, splice site strength) that distinguish between a proofreading function for HNRNPA1  
285 and a simple competition with U2AF (Jain et al. 2017).

286 Alu elements influence gene expression in diverse ways (Hasler and Strub 2006; Chen  
287 and Carmichael 2009; Gong and Maquat 2011; Pastor and Pagani 2011; Kelley et al. 2014; Tajnik  
288 et al. 2015). Recently, Zarnack et al. demonstrated that hnRNP C competes with U2AF2 to  
289 repress inclusion of Alu-derived exons in mRNA (Zarnack et al. 2013). We find that HNRNPA1  
290 over-expression correlates with increased U2AF2 association with Alu-derived RNA sequences.  
291 We did not observe any change in hnRNP C protein expression or localization (Supplemental Fig.

292 1). Taken together, our data demonstrate that Alu-derived sequences function as RNA regulatory  
293 elements that respond to changes to the intracellular concentration of splicing factors. It is  
294 intriguing to speculate that, as primate-specific elements, antisense Alu elements may influence  
295 the evolution of splicing regulation by modulating recognition of bona fide exons. Our results  
296 suggest the intriguing hypothesis that antisense Alu elements contribute to species-specific  
297 differences in alternative splicing throughout the primate lineage.

298

## 299 **Materials and Methods**

### 300 *iCLIP analysis of U2AF2, SRSF1 and HNRNPA1*

301 iCLIP was performed as previously described (Konig et al. 2010; Huppertz et al. 2014). Briefly,  
302 TREX FLP-in HEK293T cells (Invitrogen) lacking or containing a stable, inducible T7-tagged  
303 version of HNRNPA1. Cells were treated with tetracycline for 24 hr and then irradiated with UV-  
304 C light to form irreversible covalent cross-link between proteins and nucleic acids *in vivo*. After  
305 cell lysis, RNA was partially fragmented using low concentrations of Micrococcal nuclease, and  
306 U2AF65-, SRSF1-, or HNRNPA1–RNA complexes were immunopurified with U2AF65,  
307 (MC3;SCBT), SRSF1 (96;SCBT), and HNRNPA1 (4B10;SCBT) antibodies immobilized on  
308 protein A–coated magnetic beads (Life Technologies), respectively. After stringent washing and  
309 dephosphorylation (Fast AP, Fermentas), RNAs were ligated at their 3' ends with a pre-  
310 adenylated RNA adaptor (Bioo Scientific) and radioactively labeled to allow visualization.  
311 Samples were run using MOPS-based protein gel electrophoresis (in-house recipe) and  
312 transferred to a nitrocellulose membrane. Protein-RNA complexes migrating 15-80 kDa above  
313 free protein were cut from the membrane, and RNA was recovered from the membrane by  
314 proteinase K digestion under denaturing (3.5 M Urea) conditions. The oligonucleotides for  
315 reverse transcription contained two inversely oriented adaptor regions adapted from the Bioo  
316 NEXTflex small RNA library preparation kit (Bioo Scientific), separated by a BamHI restriction  
317 site as well as a barcode region at their 5' end containing a 4-nt experiment-specific barcode  
318 within a 5-nt random barcode to mark individual cDNA molecules. cDNA molecules were size-  
319 purified using denaturing PAGE gel electrophoresis, circularized by Circligase II (Epicenter),  
320 annealed to an oligonucleotide complementary to the restriction site and cut using BamHI  
321 (NEB). Linearized cDNAs were then PCR-amplified using (Immomix PCR Master Mix, Bioline)  
322 with primers (Bioo) complementary to the adaptor regions and were subjected to high-

323 throughput sequencing using Illumina HiSeq. A more detailed description of the iCLIP protocol  
324 has been published (Huppertz et al. 2014)

325 *Mapping and analysis of iCLIP sequencing data*

326 Single-end reads generated by Illumina HiSeq were inspected for the presence of adaptor  
327 sequences. Reads containing sequences corresponding to the 3'RNA adaptor were retained if  
328 they were at least 30bp long after the adaptor sequence was trimmed off. The first 9bp in each  
329 read from the iCLIP library preparation, containing an internal barcode comprising 4bp for  
330 replicate identification and 5bp of random nucleotides for use in duplicate mapping removal,  
331 were also removed before mapping. Trimmed reads were checked for mapping to a repeat filter  
332 comprising RepeatMasker elements in the human genome using Bowtie2 (Langmead et al.  
333 2009). Reads that passed the repeat filter were mapped to the transcriptome and genome with  
334 Tophat (Kim et al. 2013). If reads mapped equally well to multiple loci, a single mapping was  
335 selected randomly by Tophat. Duplicate mappings from each replicate were reduced to one per  
336 position if they had the same genomic endpoints and if they originated from reads with the same  
337 set of random 5bp nucleotides. Following mapping and duplicate removal, individual reads were  
338 truncated to their 5' ends to represent the site of crosslinking consistent with the iCLIP  
339 methodology. For all samples only such crosslinking sites found to have non-zero mapping  
340 counts in two out of three replicates (or two out of two duplicates where applicable) were  
341 considered to be biologically reproducible candidates for further analysis. The counts at such  
342 reproducible crosslinking sites were summed over all replicates to create an aggregated dataset  
343 for each cell condition and CLIP. To determine background from the iCLIP datasets, the two cell  
344 conditions (control and HNRNPA1-overexpressing) were temporarily further aggregated for  
345 each CLIP (U2AF, SF2, A1) and those binding sites that had non-zero counts in all three  
346 temporary aggregate datasets were determined. A 41 nt mask was created by extending 20nt  
347 upstream and 20nt downstream from each such 3-way common binding site. The aggregated  
348 data set of binding sites for each cell condition and CLIP was then filtered using this mask,



349 keeping only sites outside the mask that also had a mapping count of at least 3 in the aggregate  
350 data. These aggregated and filtered data were used for downstream analyses. This aggregation  
351 and filtering strategy was adapted from previously described iCLIP analysis pipelines  
352 (Friedersdorf and Keene 2014; Flynn et al. 2015). For use as input to CLIPper (Lovci et al.  
353 2013), the filtered (single nucleotide) binding sites were expanded by 15nt upstream and 15nt  
354 downstream.  
355 CLIPper (CLIP-seq peak enrichment; <https://github.com/YeoLab/CLIPper>) was used to  
356 determine genomic distribution of RNA crosslinking peaks as well as identify clusters  
357 representing binding sites for HNRNPA1, U2AF2, and SRSF1 for each condition as previously  
358 described (Lovci et al. 2013). For each condition, the resulting iCLIP peak data of the replicates  
359 were merged. The peaks were annotated to the human genome (hg19) and then divided into  
360 categories based on their genomic locations including CDS, intron, and UTR. The peaks in each  
361 category were further subsetted based on whether they overlapped with Alu elements. For the  
362 motif analysis, 50bp sequences were extracted from the peak regions (crosslinking site  $\pm$  25bp).  
363 Strand-specific MEME-ChIP and HOMER analyses were performed on these sequences to find  
364 6-10bp long, enriched motifs.

365

### 366 *RBP Binding Analysis*

367 40,769 cassette exons were extracted from MISO human genome (hg19) alternative  
368 events annotation version 2. 200,880 constitutive exons were extracted from RefSeq gene  
369 annotation by excluding the exons that overlap with cassette exons. Gene differential  
370 expression analysis was performed using edgeR. 40,952 constitutive exons that were not  
371 significantly differentially expressed (FDR > 0.05) were used in further analysis.

372 For each RNA-binding protein in each cell line, the iCLIP reads of all the replicates were  
373 merged together (Flynn et al. 2015). The start positions of the reads were considered as  
374 crosslinking sites. The number of reads near the 3' splice site (100bp into the intron, 50bp into

375 the exon) of each exon were calculated based on a 10bp window. The raw read counts were  
376 normalized by the total library size.

377 The changes in binding of U2AF2 and SF2 near 3' splice sites were further analyzed  
378 with edgeR. Read counts were calculated for 200bp intron regions near the 3' splice sites of the  
379 cassette exons. For each RBP, the regions with more than one count per million (CPM) in at  
380 least half of the replicates in either of the cell line were used for binding change analysis.

381

### 382 *RBP Binding Near Alu Elements*

383 315,974 antisense Alu elements were extracted from RepeatMasker. The merged iCLIP data for  
384 each condition was down-sampled to 1M reads. The total number of sense strand reads were  
385 calculated for Alu and nearby regions (250bp from Alu boundary). For each cassette exon  
386 events (cassette exon + up/downstream introns + up/downstream exons), the number of reads  
387 in antisense Alu elements, and the total number of reads in the whole event were calculated  
388 separately. The proportion of reads that fall into antisense Alu elements for each event was  
389 used to represent the RBP binding change in Alu regions.

390

### 391 *mRNA-seq of control or HNRNPA1-overexpressing HEK293 cells.*

392 RNA was isolated from whole cell lysates of control and HNRNPA1-overexpressing TREX Flp-  
393 IN HEK 293T cells using TRI-Reagent LS (Sigma). Poly-A<sup>+</sup> sequencing libraries were prepared  
394 using the TrueSeq RNA library prep kit (Illumina, San Diego, CA). Each condition was analyzed  
395 in duplicate using the HiSeq2000.

396

### 397 *Quantification of alternative splicing by RNA-Seq*

398 Poly-A<sup>+</sup> transcriptome sequencing reads were mapped to the human reference genome (hg19)  
399 with TopHat2. Mapped reads of duplicates were merged together for splicing analysis. Splicing

400 change was analyzed with MISO (Katz et al. 2010). The MISO result was filtered with the  
401 following parameters: --num-inc 1 --num-exc 1 --num-sum-exc 10 --delta-psi 0.20 --bayes-factor  
402 10. After filtering, 267 skipped exon events were left for further analysis.

403

#### 404 *Mapping to an ALU consensus sequence*

405 ALU element annotations were obtained from the hg19 UCSC Genome Browser RepeatMasker  
406 track. A strategy similar to the one described in Jacobs et al. (Jacobs et al. 2014) was used to  
407 show the CLIPper peak density over all ALU elements as follows: after removal of the longest  
408 2%, the top 50 longest human ALU sequences were aligned with MUSCLE and used to  
409 construct a consensus sequence. CLIPper peaks were mapped from the genomic position to  
410 the consensus sequence position using a BLAT alignment of the repeat to the consensus and  
411 the coverage of summits per bp of the consensus AluSc was plotted in Supplemental Figure 5c.  
412 A Genome Browser Session displaying the Repeat Masker Data can be found here:

413 ([http://genome.ucsc.edu/cgi-](http://genome.ucsc.edu/cgi-bin/hgTracks?hgS_doOtherUser=submit&hgS_otherUserName=Max&hgS_otherUserSessionName=pubRepeats2Saford)  
414 [bin/hgTracks?hgS\\_doOtherUser=submit&hgS\\_otherUserName=Max&hgS\\_otherUserSessionName=pubRepeats2Sa](http://genome.ucsc.edu/cgi-bin/hgTracks?hgS_doOtherUser=submit&hgS_otherUserName=Max&hgS_otherUserSessionName=pubRepeats2Saford)  
415 [ford](http://genome.ucsc.edu/cgi-bin/hgTracks?hgS_doOtherUser=submit&hgS_otherUserName=Max&hgS_otherUserSessionName=pubRepeats2Saford)).

416

417

#### 418 **Abbreviations**

419 **3'ss**: 3' splice site    **iCLIP**: individual nucleotide resolution cross-linking immunoprecipitation  
420 **HNRNPA1**: heterogeneous nuclear ribonucleoproteins A    **U2AF2**: U2 Small Nuclear RNA  
421 Auxiliary Factor 2    **SRSF1**: Serine/arginine-rich splicing factor 1    **SRSF6**: Serine/arginine-rich  
422 splicing factor 6    **PIEZO1**: Piezo type mechanosensitive ion channel component 1,  
423 **TRNAU1AP**: tRNA selenocysteine 1-associated protein 1    **hnRNP C**: heterogeneous nuclear  
424 ribonucleoproteins C1/C2

425

426 **Declarations**

427

428 **Ethics approval and consent to participate:**

429 Ethics approval was not needed for this study.

430 **Consent for publication:**

431 Not applicable.

432 **Availability of data and materials:**

433 The datasets generated and analysed during the current study are available on GEO (Gene  
434 Expression Omnibus; <https://www.ncbi.nlm.nih.gov/geo/>) under accession GSE83923.

435 **Competing interests:**

436 The authors declare that they have no competing interests.

437 **Funding:**

438 This project was supported by NIH Grants GM1090146 (JRS), HG007336 (MT) and GM008646  
439 (NIH Training Grant Support for JMD).

440 **Authors contributions:**

441 JMH, HL, YL and JRS designed the experiments. JMH, HL, GK, JMD, and SK performed the  
442 experiments. JMH, HL, GK, JMD, YL and JRS wrote and edited the manuscript. All authors read  
443 and approved the final manuscript.

444

445 **Acknowledgements:**

446 We thank Professors Javier Caceres (MRC HGU, Edinburgh), Manny Ares (UCSC) and Al  
447 Zahler (UCSC) for discussion of the project. We thank Julia Philipp (UCSC) for thoughtful  
448 comments on the manuscript.

449

450

451

452

453

454

455

456 **References**

- 457 Akerman M, Fregoso OI, Das S, Ruse C, Jensen MA, Pappin DJ, Zhang MQ, Krainer AR. 2015.  
458 Differential connectivity of splicing activators and repressors to the human spliceosome.  
459 *Genome biology* **16**: 119.
- 460 Berglund JA, Chua K, Abovich N, Reed R, Rosbash M. 1997. The splicing factor BBP interacts  
461 specifically with the pre-mRNA branchpoint sequence UACUAAC. *Cell* **89**: 781-787.
- 462 Blanchette M, Chabot B. 1999. Modulation of exon skipping by high-affinity hnRNP A1-binding  
463 sites and by intron elements that repress splice site utilization. *The EMBO journal* **18**:  
464 1939-1952.
- 465 Caceres JF, Stamm S, Helfman DM, Krainer AR. 1994. Regulation of alternative splicing in vivo by  
466 overexpression of antagonistic splicing factors. *Science* **265**: 1706-1709.
- 467 Chen LL, Carmichael GG. 2009. Altered nuclear retention of mRNAs containing inverted repeats  
468 in human embryonic stem cells: functional role of a nuclear noncoding RNA. *Molecular*  
469 *cell* **35**: 467-478.
- 470 Chen M, Zhang J, Manley JL. 2010. Turning on a fuel switch of cancer: hnRNP proteins regulate  
471 alternative splicing of pyruvate kinase mRNA. *Cancer research* **70**: 8977-8980.
- 472 Cho S, Moon H, Loh TJ, Jang HN, Liu Y, Zhou J, Ohn T, Zheng X, Shen H. 2015. Splicing inhibition  
473 of U2AF65 leads to alternative exon skipping. *Proceedings of the National Academy of*  
474 *Sciences of the United States of America* **112**: 9926-9931.
- 475 Chou MY, Underwood JG, Nikolic J, Luu MH, Black DL. 2000. Multisite RNA binding and release  
476 of polypyrimidine tract binding protein during the regulation of c-src neural-specific  
477 splicing. *Molecular cell* **5**: 949-957.
- 478 Eperon IC, Ireland DC, Smith RA, Mayeda A, Krainer AR. 1993. Pathways for selection of 5' splice  
479 sites by U1 snRNPs and SF2/ASF. *The EMBO journal* **12**: 3607-3617.
- 480 Eperon IC, Makarova OV, Mayeda A, Munroe SH, Caceres JF, Hayward DG, Krainer AR. 2000.  
481 Selection of alternative 5' splice sites: role of U1 snRNP and models for the antagonistic  
482 effects of SF2/ASF and hnRNP A1. *Molecular and cellular biology* **20**: 8303-8318.
- 483 Flynn RA, Martin L, Spitale RC, Do BT, Sagan SM, Zarnegar B, Qu K, Khavari PA, Quake SR,  
484 Sarnow P et al. 2015. Dissecting noncoding and pathogen RNA-protein interactomes.  
485 *Rna* **21**: 135-143.

- 486 Friedersdorf MB, Keene JD. 2014. Advancing the functional utility of PAR-CLIP by quantifying  
487 background binding to mRNAs and lncRNAs. *Genome biology* **15**: R2.
- 488 Fu XD, Ares M, Jr. 2014. Context-dependent control of alternative splicing by RNA-binding  
489 proteins. *Nature reviews Genetics* **15**: 689-701.
- 490 Gal-Mark N, Schwartz S, Ram O, Eyraş E, Ast G. 2009. The pivotal roles of TIA proteins in 5'  
491 splice-site selection of alu exons and across evolution. *PLoS genetics* **5**: e1000717.
- 492 Gong C, Maquat LE. 2011. lncRNAs transactivate STAU1-mediated mRNA decay by duplexing  
493 with 3' UTRs via Alu elements. *Nature* **470**: 284-288.
- 494 Hasler J, Strub K. 2006. Alu elements as regulators of gene expression. *Nucleic acids research*  
495 **34**: 5491-5497.
- 496 Huppertz I, Attig J, D'Ambrogio A, Easton LE, Sibley CR, Sugimoto Y, Tajnik M, König J, Ule J.  
497 2014. iCLIP: protein-RNA interactions at nucleotide resolution. *Methods* **65**: 274-287.
- 498 Jacobs FM, Greenberg D, Nguyen N, Haeussler M, Ewing AD, Katzman S, Paten B, Salama SR,  
499 Haussler D. 2014. An evolutionary arms race between KRAB zinc-finger genes ZNF91/93  
500 and SVA/L1 retrotransposons. *Nature* **516**: 242-245.
- 501 Jain N, Lin HC, Morgan CE, Harris ME, Tolbert BS. 2017. Rules of RNA specificity of hnRNP A1  
502 revealed by global and quantitative analysis of its affinity distribution. *Proceedings of  
503 the National Academy of Sciences of the United States of America* **114**: 2206-2211.
- 504 Jamison SF, Pasman Z, Wang J, Will C, Luhrmann R, Manley JL, Garcia-Blanco MA. 1995. U1  
505 snRNP-ASF/SF2 interaction and 5' splice site recognition: characterization of required  
506 elements. *Nucleic acids research* **23**: 3260-3267.
- 507 Katz Y, Wang ET, Airoidi EM, Burge CB. 2010. Analysis and design of RNA sequencing  
508 experiments for identifying isoform regulation. *Nat Methods* **7**: 1009-1015.
- 509 Kelley DR, Hendrickson DG, Tenen D, Rinn JL. 2014. Transposable elements modulate human  
510 RNA abundance and splicing via specific RNA-protein interactions. *Genome biology* **15**:  
511 537.
- 512 Kim D, Pertea G, Trapnell C, Pimentel H, Kelley R, Salzberg SL. 2013. TopHat2: accurate  
513 alignment of transcriptomes in the presence of insertions, deletions and gene fusions.  
514 *Genome biology* **14**: R36.
- 515 König J, Zarnack K, Rot G, Curk T, Kayikci M, Zupan B, Turner DJ, Luscombe NM, Ule J. 2010.  
516 iCLIP reveals the function of hnRNP particles in splicing at individual nucleotide  
517 resolution. *Nature structural & molecular biology* **17**: 909-915.
- 518 Lamichhane R, Daubner GM, Thomas-Crusells J, Auweter SD, Manatschal C, Austin KS, Valniuk  
519 O, Allain FH, Rueda D. 2010. RNA looping by PTB: Evidence using FRET and NMR  
520 spectroscopy for a role in splicing repression. *Proceedings of the National Academy of  
521 Sciences of the United States of America* **107**: 4105-4110.
- 522 Langmead B, Trapnell C, Pop M, Salzberg SL. 2009. Ultrafast and memory-efficient alignment of  
523 short DNA sequences to the human genome. *Genome biology* **10**: R25.
- 524 Lareau LF, Inada M, Green RE, Wengrod JC, Brenner SE. 2007. Unproductive splicing of SR genes  
525 associated with highly conserved and ultraconserved DNA elements. *Nature* **446**: 926-  
526 929.
- 527 Lev-Maor G, Ram O, Kim E, Sela N, Goren A, Levanon EY, Ast G. 2008. Intronic Alus influence  
528 alternative splicing. *PLoS genetics* **4**: e1000204.

- 529 Loh TJ, Moon H, Cho S, Jang H, Liu YC, Tai H, Jung DW, Williams DR, Kim HR, Shin MG et al.  
530 2015. CD44 alternative splicing and hnRNP A1 expression are associated with the  
531 metastasis of breast cancer. *Oncol Rep* **34**: 1231-1238.
- 532 Lovci MT, Ghanem D, Marr H, Arnold J, Gee S, Parra M, Liang TY, Stark TJ, Gehman LT, Hoon S et  
533 al. 2013. Rbfox proteins regulate alternative mRNA splicing through evolutionarily  
534 conserved RNA bridges. *Nature structural & molecular biology* **20**: 1434-1442.
- 535 Mayeda A, Krainer AR. 1992. Regulation of alternative pre-mRNA splicing by hnRNP A1 and  
536 splicing factor SF2. *Cell* **68**: 365-375.
- 537 Merendino L, Guth S, Bilbao D, Martinez C, Valcarcel J. 1999. Inhibition of msl-2 splicing by Sex-  
538 lethal reveals interaction between U2AF35 and the 3' splice site AG. *Nature* **402**: 838-  
539 841.
- 540 Ni JZ, Grate L, Donohue JP, Preston C, Nobida N, O'Brien G, Shiue L, Clark TA, Blume JE, Ares Jr.  
541 M. 2007. Ultraconserved elements are associated with homeostatic control of splicing  
542 regulators by alternative splicing and nonsense-mediated decay. *Genes & development*  
543 **21**: 708-718.
- 544 Noensie EN, Dietz HC. 2001. A strategy for disease gene identification through nonsense-  
545 mediated mRNA decay inhibition. *Nature biotechnology* **19**: 434-439.
- 546 Okunola HL, Krainer AR. 2009. Cooperative-binding and splicing-repressive properties of hnRNP  
547 A1. *Molecular and cellular biology* **29**: 5620-5631.
- 548 Pastor T, Pagani F. 2011. Interaction of hnRNPA1/A2 and DAZAP1 with an Alu-derived intronic  
549 splicing enhancer regulates ATM aberrant splicing. *PLoS one* **6**: e23349.
- 550 Pino I, Pio R, Toledo G, Zabalegui N, Vicent S, Rey N, Lozano MD, Torre W, Garcia-Foncillas J,  
551 Montuenga LM. 2003. Altered patterns of expression of members of the heterogeneous  
552 nuclear ribonucleoprotein (hnRNP) family in lung cancer. *Lung Cancer* **41**: 131-143.
- 553 Rothrock C, Cannon B, Hahm B, Lynch KW. 2003. A conserved signal-responsive sequence  
554 mediates activation-induced alternative splicing of CD45. *Molecular cell* **12**: 1317-1324.
- 555 Ruskin B, Zamore PD, Green MR. 1988. A factor, U2AF, is required for U2 snRNP binding and  
556 splicing complex assembly. *Cell* **52**: 207-219.
- 557 Schwartz S, Gal-Mark N, Kfir N, Oren R, Kim E, Ast G. 2009. Alu exonization events reveal  
558 features required for precise recognition of exons by the splicing machinery. *PLoS*  
559 *computational biology* **5**: e1000300.
- 560 Shao C, Yang B, Wu T, Huang J, Tang P, Zhou Y, Zhou J, Qiu J, Jiang L, Li H et al. 2014.  
561 Mechanisms for U2AF to define 3' splice sites and regulate alternative splicing in the  
562 human genome. *Nature structural & molecular biology* **21**: 997-1005.
- 563 Sorek R, Ast G, Graur D. 2002. Alu-containing exons are alternatively spliced. *Genome research*  
564 **12**: 1060-1067.
- 565 Tajnik M, Vigilante A, Braun S, Hanel H, Luscombe NM, Ule J, Zarnack K, Konig J. 2015.  
566 Intergenic Alu exonisation facilitates the evolution of tissue-specific transcript ends.  
567 *Nucleic acids research* **43**: 10492-10505.
- 568 Tavanez JP, Madl T, Kooshapur H, Sattler M, Valcarcel J. 2012. hnRNP A1 proofreads 3' splice  
569 site recognition by U2AF. *Molecular cell* **45**: 314-329.
- 570 Ushigome M, Ubagai T, Fukuda H, Tsuchiya N, Sugimura T, Takatsuka J, Nakagama H. 2005. Up-  
571 regulation of hnRNP A1 gene in sporadic human colorectal cancers. *Int J Oncol* **26**: 635-  
572 640.



- 573 Wahl MC, Will CL, Luhrmann R. 2009. The Spliceosome: Design Principles of a Dynamic RNP  
574 Machine. *Cell* **136**: 701-718.
- 575 Wu S, Romfo CM, Nilsen TW, Green MR. 1999. Functional recognition of the 3' splice site AG by  
576 the splicing factor U2AF35. *Nature* **402**: 832-835.
- 577 Yang X, Bani MR, Lu SJ, Rowan S, Ben-David Y, Chabot B. 1994. The A1 and A1B proteins of  
578 heterogeneous nuclear ribonucleoproteins modulate 5' splice site selection in vivo.  
579 *Proceedings of the National Academy of Sciences of the United States of America* **91**:  
580 6924-6928.
- 581 Yu C, Guo J, Liu Y, Jia J, Jia R, Fan M. 2015. Oral squamous cancer cell exploits hnRNP A1 to  
582 regulate cell cycle and proliferation. *J Cell Physiol* **230**: 2252-2261.
- 583 Zahler AM, Damgaard CK, Kjems J, Caputi M. 2004. SC35 and heterogeneous nuclear  
584 ribonucleoprotein A/B proteins bind to a juxtaposed exonic splicing enhancer/exonic  
585 splicing silencer element to regulate HIV-1 tat exon 2 splicing. *The Journal of biological*  
586 *chemistry* **279**: 10077-10084.
- 587 Zarnack K, König J, Tajnik M, Martincorena I, Eustermann S, Stevant I, Reyes A, Anders S,  
588 Luscombe NM, Ule J. 2013. Direct competition between hnRNP C and U2AF65 protects  
589 the transcriptome from the exonization of Alu elements. *Cell* **152**: 453-466.
- 590 Zhu J, Mayeda A, Krainer AR. 2001. Exon identity established through differential antagonism  
591 between exonic splicing silencer-bound hnRNP A1 and enhancer-bound SR proteins.  
592 *Molecular cell* **8**: 1351-1361.
- 593 Zorio DA, Blumenthal T. 1999. Both subunits of U2AF recognize the 3' splice site in  
594 *Caenorhabditis elegans*. *Nature* **402**: 835-838.
- 595



596 **Figures Legends**

597

598 **Fig. 1. Crosslinking immunoprecipitation of U2AF2 under HNRNPA1 modulation.**

599 **(A)** Western blot analysis of SRSF1, U2AF2, HNRNPA1, the T7 epitope and EWSR1 in control  
600 (lane 1) and HNRNPA1 over-expression HEK293 cells. **(B)** Examples of iCLIP autoradiographs  
601 for U2AF2 either control or following over-expression of HNRNPA1. Protein-RNA complex  
602 shifts are UV-, antibody- and Micrococcal nuclease-sensitive. Bars denote the region of  
603 nitrocellulose blot excised for RNA isolation for iCLIP library preparation. Micrococcal Nuclease  
604 treatment at 15U (high) and 0.015U (low). **(C)** CLIPper analysis of iCLIP RNA distribution for  
605 U2AF2 in control and HNRNPA1 over-expression conditions. **(D)** Top HOMER consensus  
606 binding motifs for U2AF2 in control and HNRNPA1 over-expression conditions.

607

608 **Fig. 2 HNRNPA1 induced redistribution of U2AF2 crosslinking near 3' splice sites.**

609 **(A, B)** Normalized crosslinking distribution for U2AF2 in wild-type (blue line) and HNRNPA1  
610 over-expression cell lines (red line) with 95% confidence interval (gray area). Data is divided  
611 between constitutive (A) and cassette (B) exons. **(C)** Natural log fold change distribution of  
612 U2AF2 within 200bp intron regions near 3' splice sites of cassette exons. Blue bars correspond  
613 to annotated alternative splicing events with no evidence of HNRNPA1 crosslinking in either  
614 condition and pink represents annotated events with detectable HNRNPA1 crosslinking.

615

616 **Figure 3. Non-canonical U2AF2 binding sites influence HNRNPA1-dependent exon**  
617 **skipping.**

618 **(A)** Bar graph of all HNRNPA1-dependent splicing changes as detected by MISO  
619 analysis. Events determined from the comparison of RNA-seq data derived from HNRNPA1  
620 over-expressing HEK293T cell vs control HEK293T cells. **(B-D)** Sashimi plots showing read and

621 junction coverage for three genes: ACIN1, SRSF6 and TRNAU1AP. Virtual Gel representation  
622 of Agilent 2100 Bioanalyzer DNA 1000 assay of RT-PCR products corresponding to  
623 endogenous ACIN1, SRSF6 and TRNAU1AP from control and HNRNPA1 over-expression cells  
624 (lower left panel). Bar graph depicting mean exon inclusion for TRNAU1AP and SRSF6 splicing  
625 reporters quantified using an Agilent 2100 Bioanalyzer with standard deviation bars.  $P < 0.05$ ,  
626 \*;  $P < 0.01$ , \*\*;  $P < 0.001$ , \*\*\* (lower right panel). **(E)** UCSC Genome Browser screen shot of  
627 U2AF2 iCLIP read coverage at the SRSF6 exon 3 locus in control or HNRNPA1 overexpression  
628 cells (bottom and top three tracks, respectively). Peaks called by CLIPPER are depicted below  
629 the coverage tracks. Red box denotes the 3'ss of SRSF6 exon 3. **(F)** Splicing reporter  
630 constructs created representing wild-type (Wt) or mutant (Mt) versions of alternative exons in  
631 SRSF6. Non-canonical U2AF2 binding sites in SRSF6 were mutated (red lines) by deletion.  
632 GloE1, GloE2, and GloE3 designate exons 1–3 of beta-globin. The polyadenylation signal from  
633 the bovine growth hormone 1 gene is indicated by bGH pA. **(G)** Representative western blots  
634 probed with antibodies against HSP90, HNRNPA1 and the T7 epitope. Lysates were prepared  
635 from HEK293T cells transiently transfected with either wild type (WT) or mutant (MT) SRSF6  
636 reporter construct and control or T7 epitope tagged HNRNPA1. **(H)** Virtual Gel representation of  
637 Agilent 2100 Bioanalyzer DNA 1000 assay of RT-PCR products from SRSF6 splicing construct  
638 transfections. **(I)** Bar graph depicting mean exon inclusion for SRSF6 splicing reporters  
639 quantified using an Agilent 2100 Bioanalyzer with standard deviation bars.  $P < 0.05$ , \*.

640

641 **Fig. 4. HNRNPA1 over-expression correlates with global redistribution of U2AF2 signal**  
642 **to *Alu* RNA elements. (A)** Aggregated crosslinking sites on *Alu* elements and nearby regions  
643 for U2AF2. Blue represents wild-type binding of the given RNA binding protein and red  
644 represents HNRNPA1 over-expression of the  $\log_{10}$  number of iCLIP read counts across all  
645 antisense-*Alu* elements. **(B)** Distribution of aggregated U2AF2 iCLIP peaks on *Alu* subtype  
646 *AluSc* under control and HNRNPA1 over-expression conditions. **(C)** Model representing two

647 potential modes by which U2AF2 may associate with Alu RNA: *trans*- competition suggests  
648 U2AF2 binds to Alu elements on other RNAs, while a *cis*-competition suggest U2AF2 binds to  
649 *Alu* elements within the same RNAs that a particular exon is associated. **(D)** Scatter plot of all  
650 human cassette exons measuring the proportion of U2AF2 iCLIP crosslinking sites found within  
651 *Alu* elements within the cassette exon event over the total number of crosslinks found within the  
652 event. Proportions from control and HNRNPA1 over-expression samples are compared for each  
653 individual cassette exon event. **(E)** Box plot representing the distance of *Alu* elements from  
654 cassette exons (blue) and constitutive exons (orange) that show no change in U2AF2 cross-  
655 linking versus those that show an increase in U2AF2 crosslinking.  
656

657

658

| <b>Table 1. Summary of HNRNPA1-dependent changes in exon skipping with detectable U2AF2 crosslinking</b> |                   |                    |                       |
|----------------------------------------------------------------------------------------------------------|-------------------|--------------------|-----------------------|
|                                                                                                          | Total # of Events | U2AF2 Crosslinking | No U2AF2 Crosslinking |
| <b>HNRNPA1-dependent exon inclusion</b>                                                                  | 59                | 9                  | 50                    |
| <b>HNRNPA1-dependent exon skipping</b>                                                                   | 208               | 74                 | 134                   |

659

660

| <b>Table 2. Summary of HNRNPA1-dependent changes in exon skipping and U2AF2 positioning</b> |                   |                                                          |                 |                       |
|---------------------------------------------------------------------------------------------|-------------------|----------------------------------------------------------|-----------------|-----------------------|
|                                                                                             |                   | HNRNPA1-dependent change in U2AF2 crosslinking near 3'ss |                 |                       |
|                                                                                             | Total # of Events | Increased U2AF2                                          | Decreased U2AF2 | Redistribution to Alu |
| <b>HNRNPA1-dependent exon inclusion</b>                                                     | 3                 | 2                                                        | 1               | 2                     |
| <b>HNRNPA1-dependent exon skipping</b>                                                      | 41                | 19                                                       | 22              | 17                    |

661

662

663

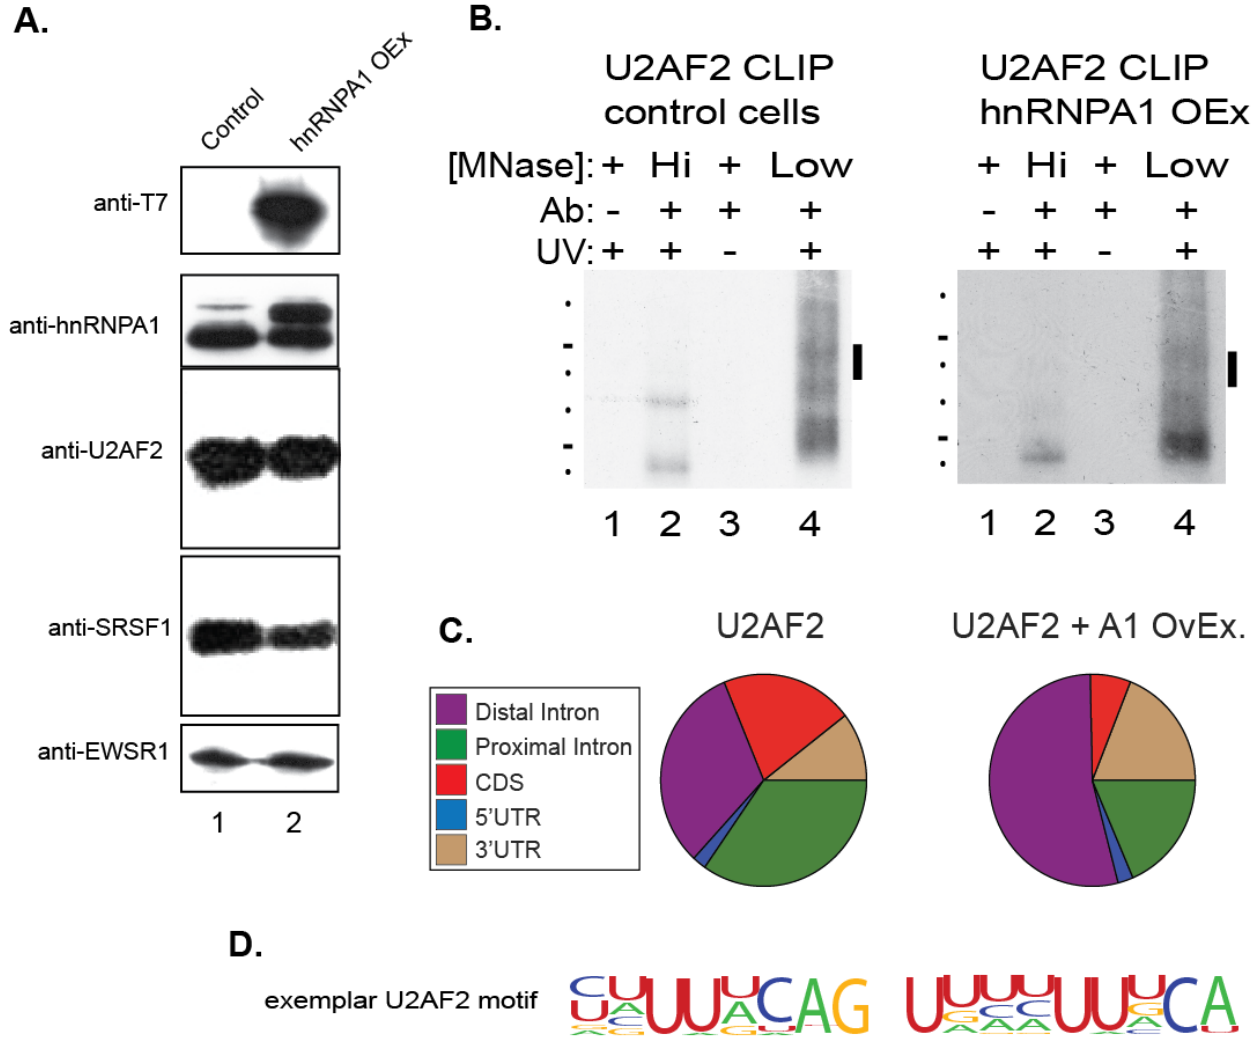

**Fig. 1**

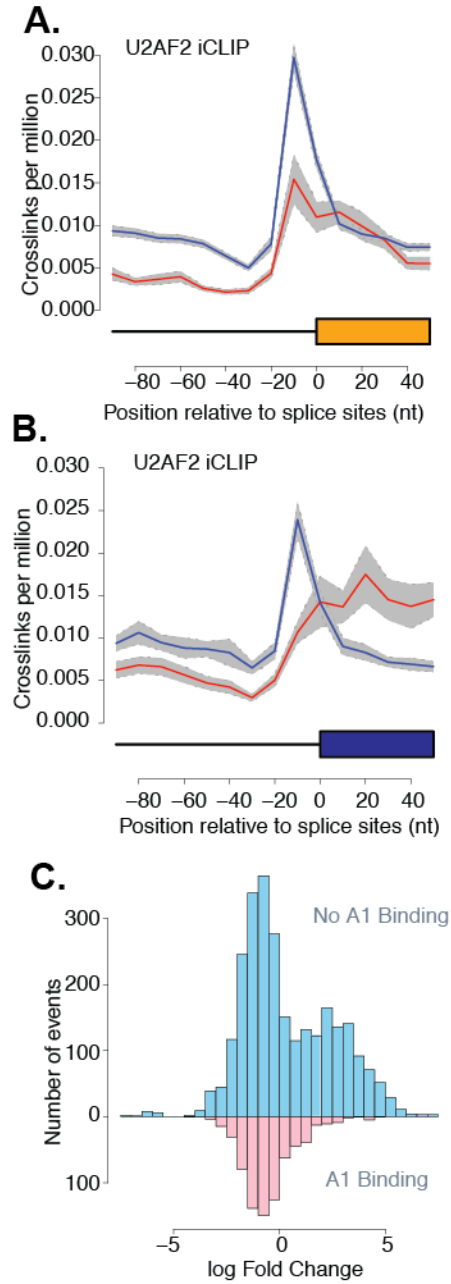

**Fig. 2**

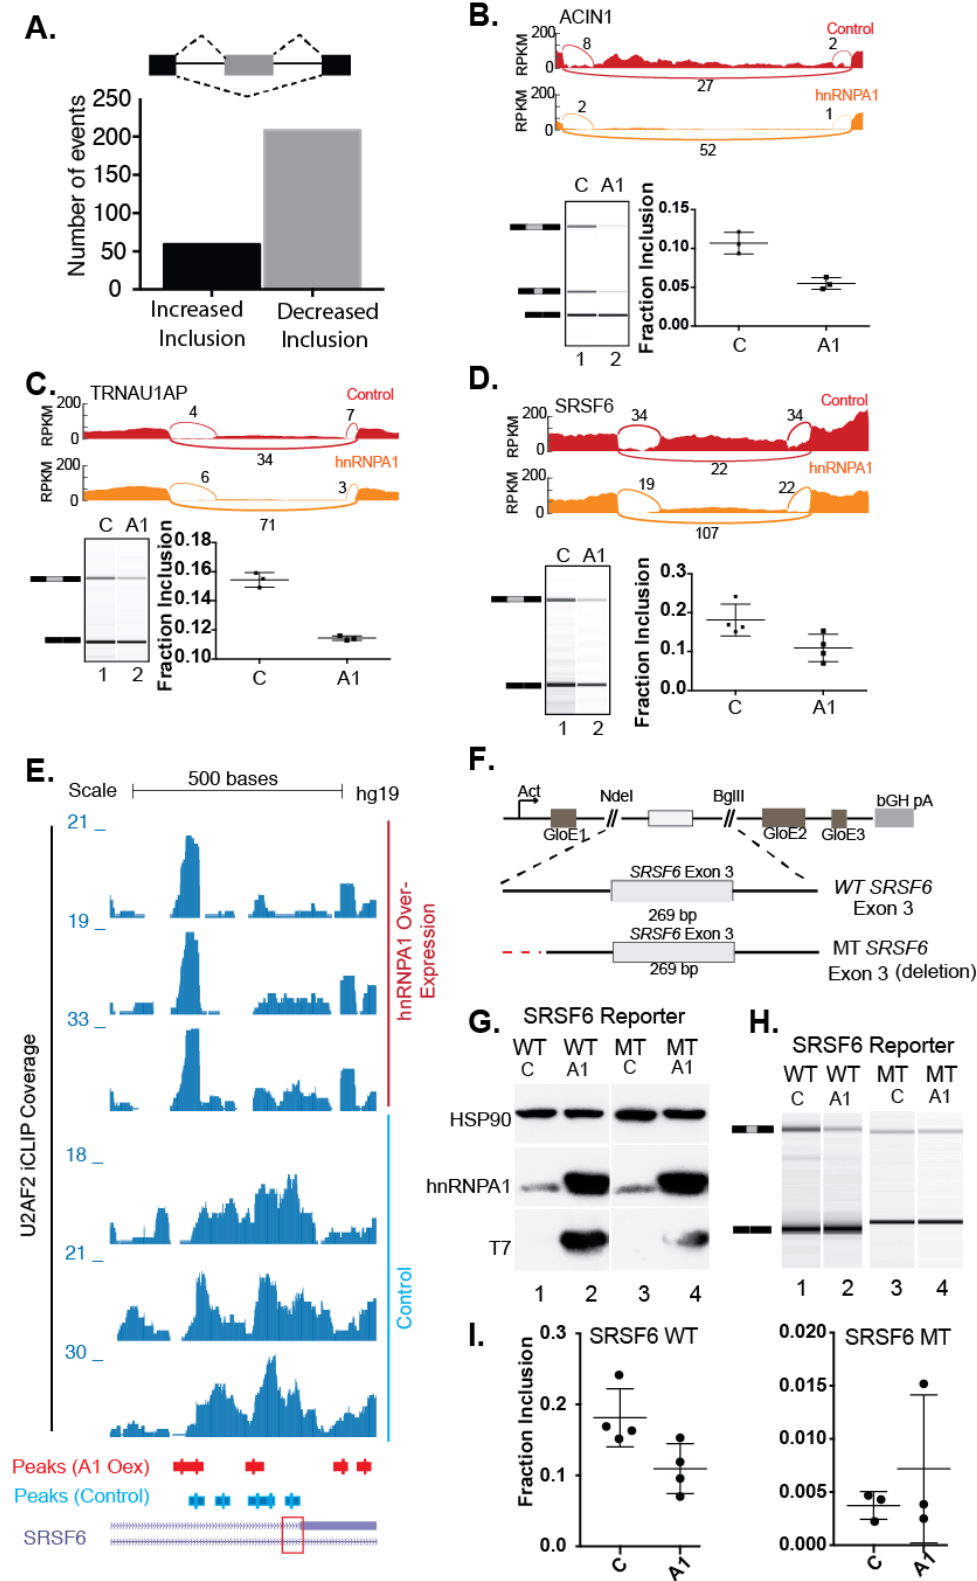

**Fig. 3**

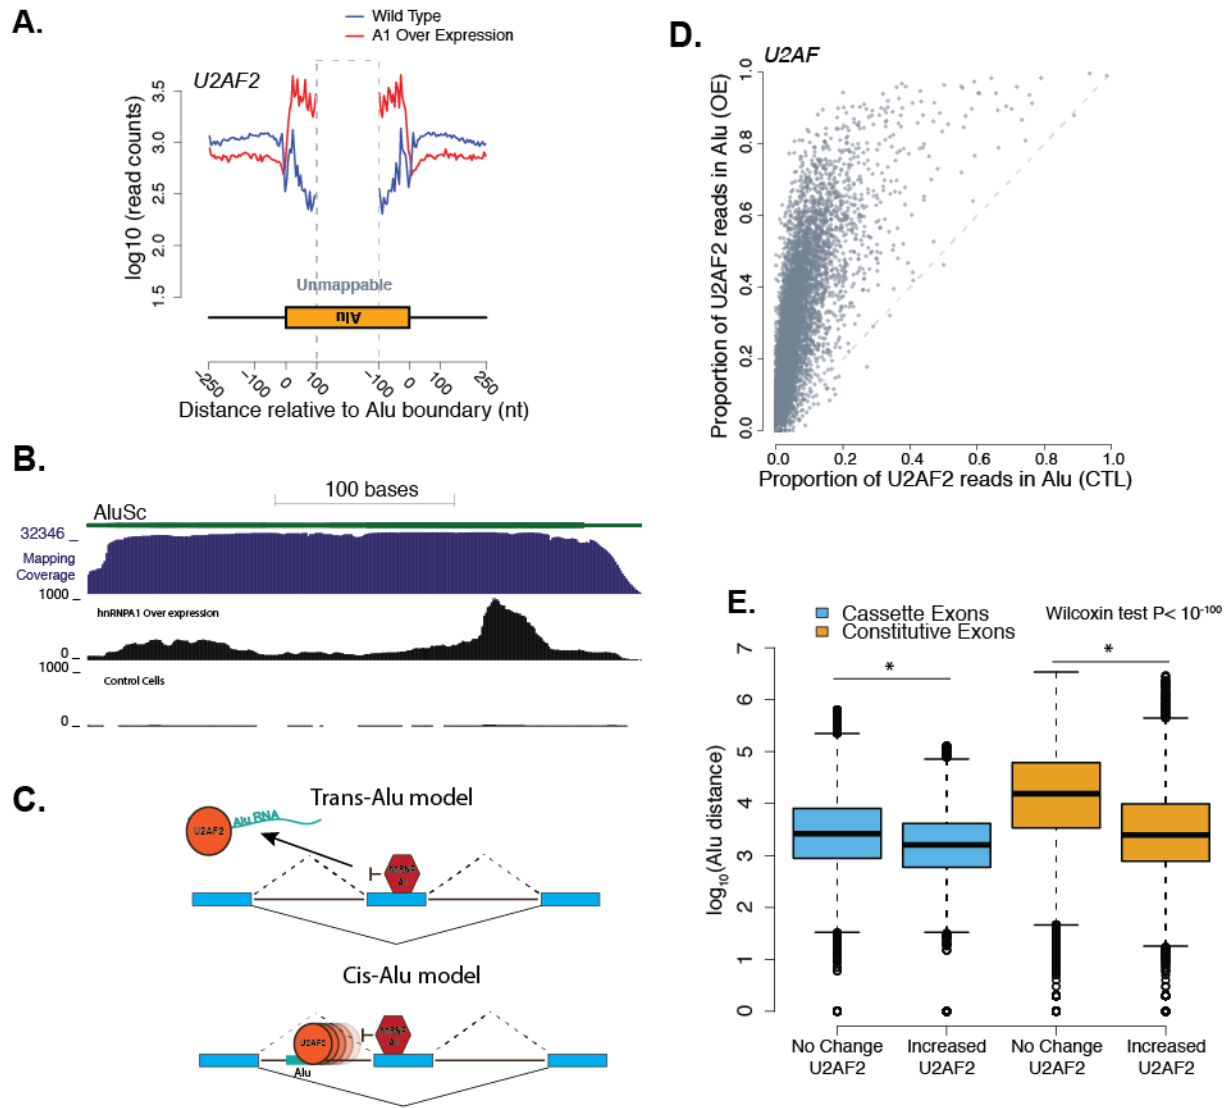

**Fig. 4**



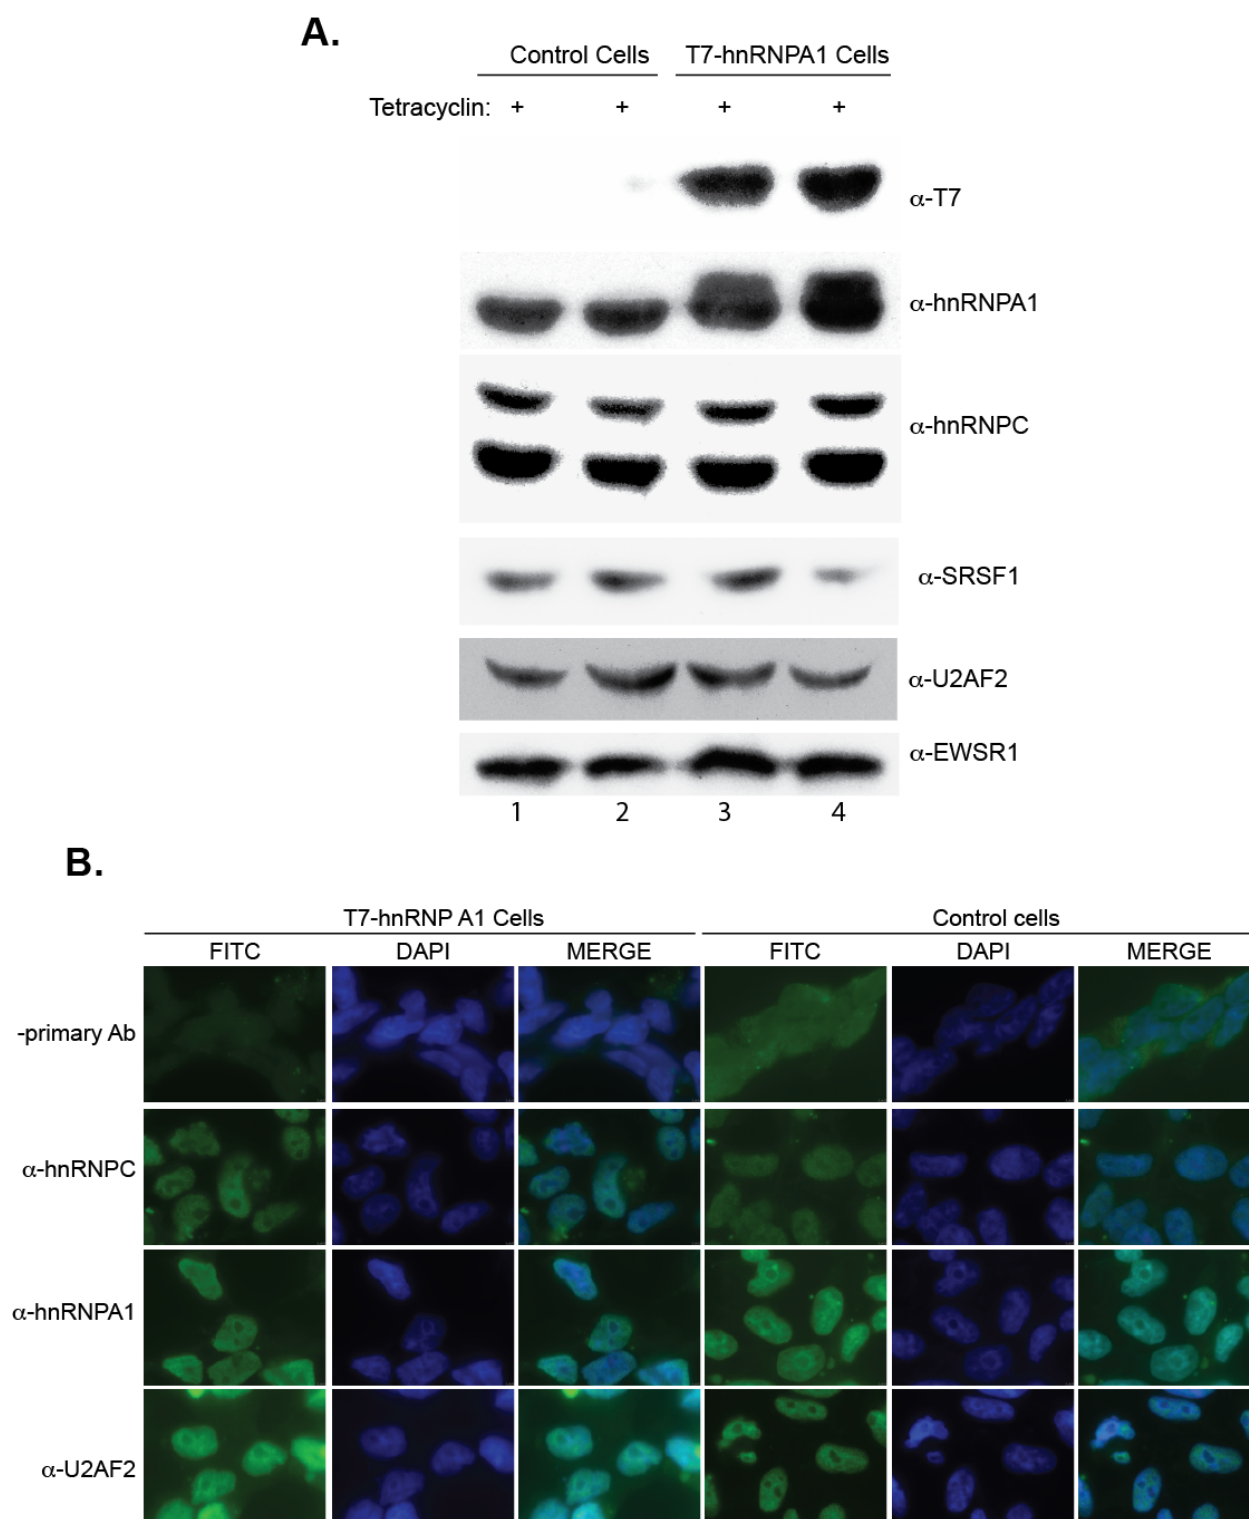

Supplemental Fig. 1

**A.**

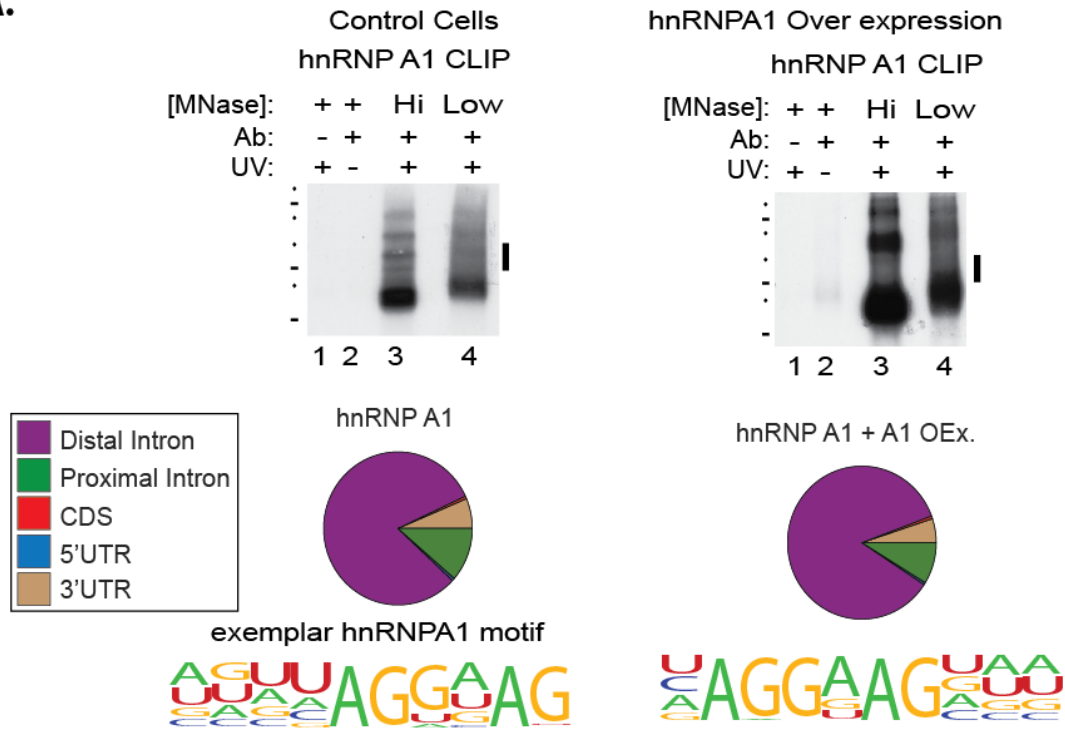

**B.**

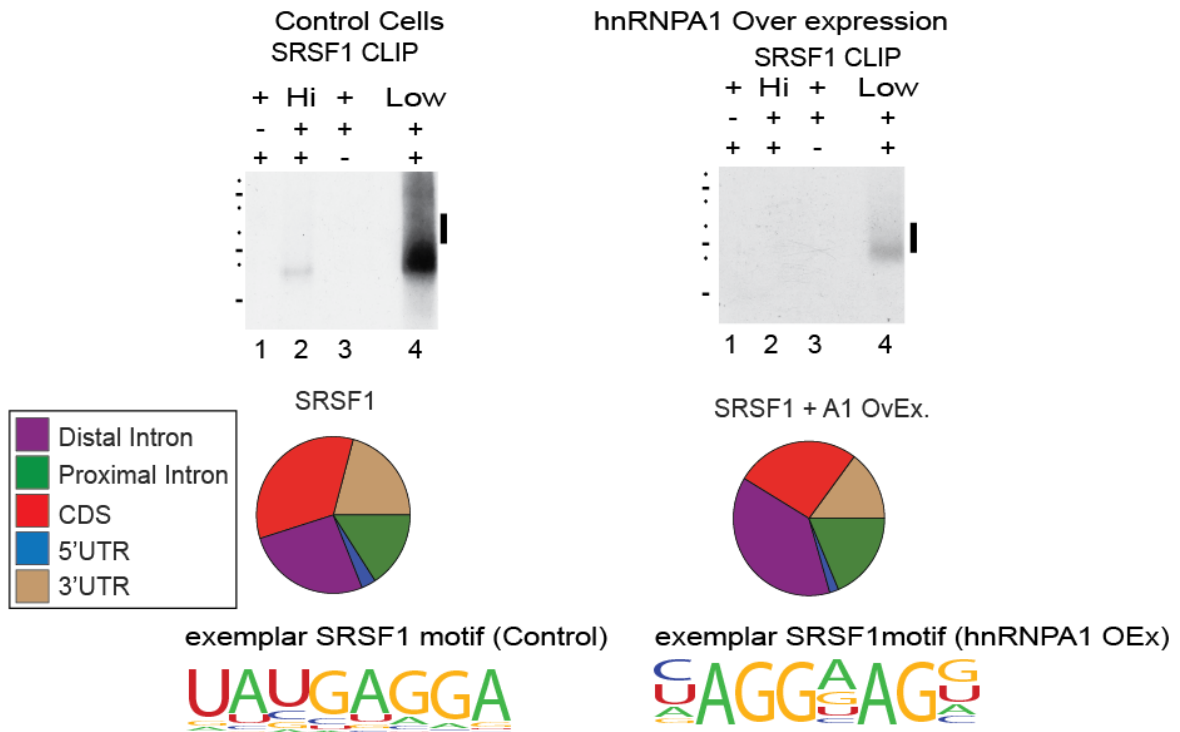

Supplemental Fig. 2

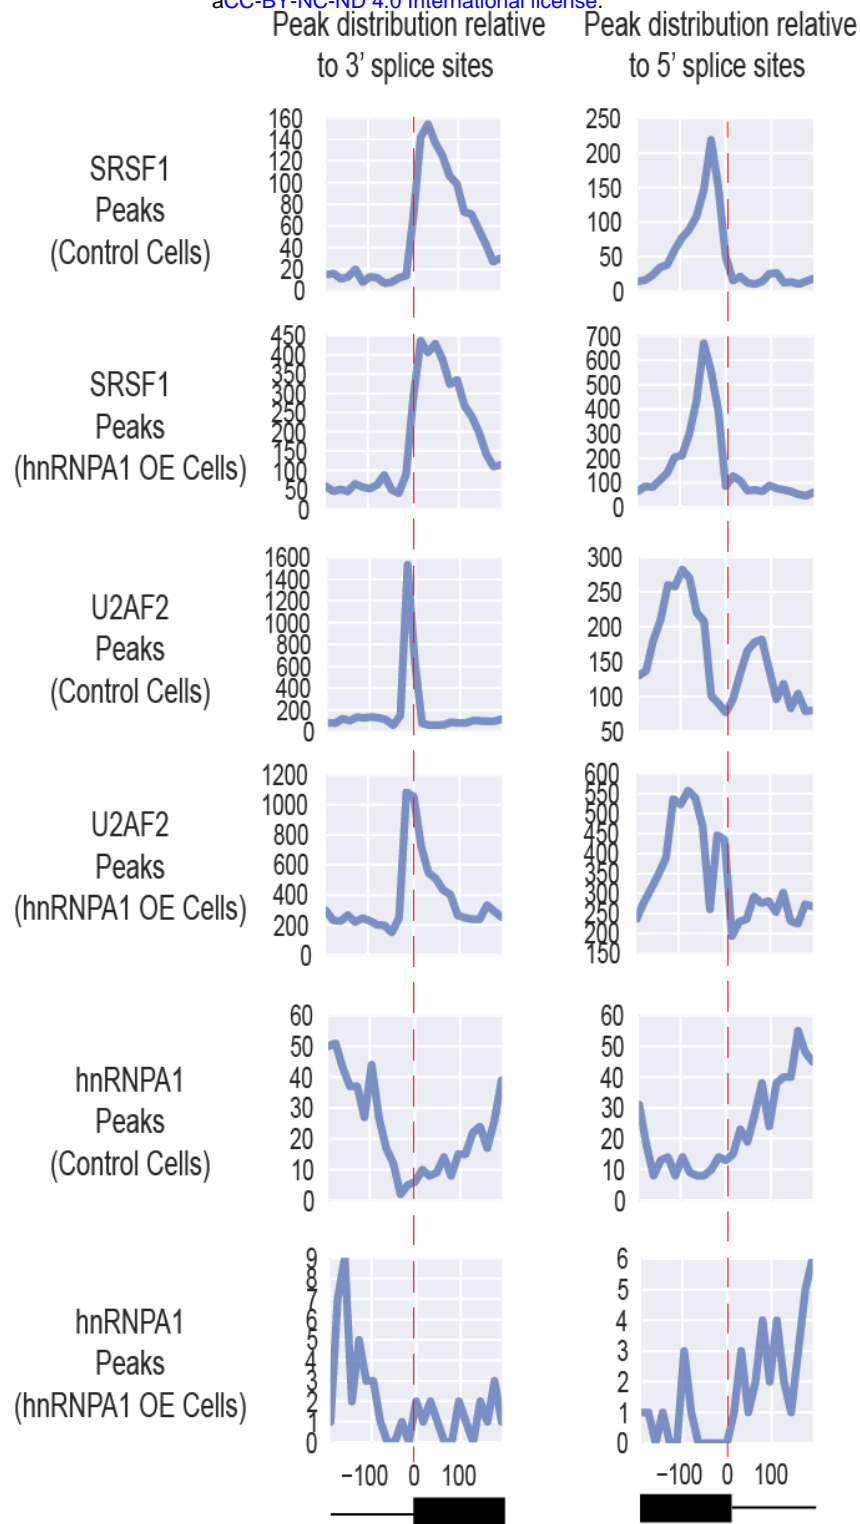

Supplemental Fig. 3

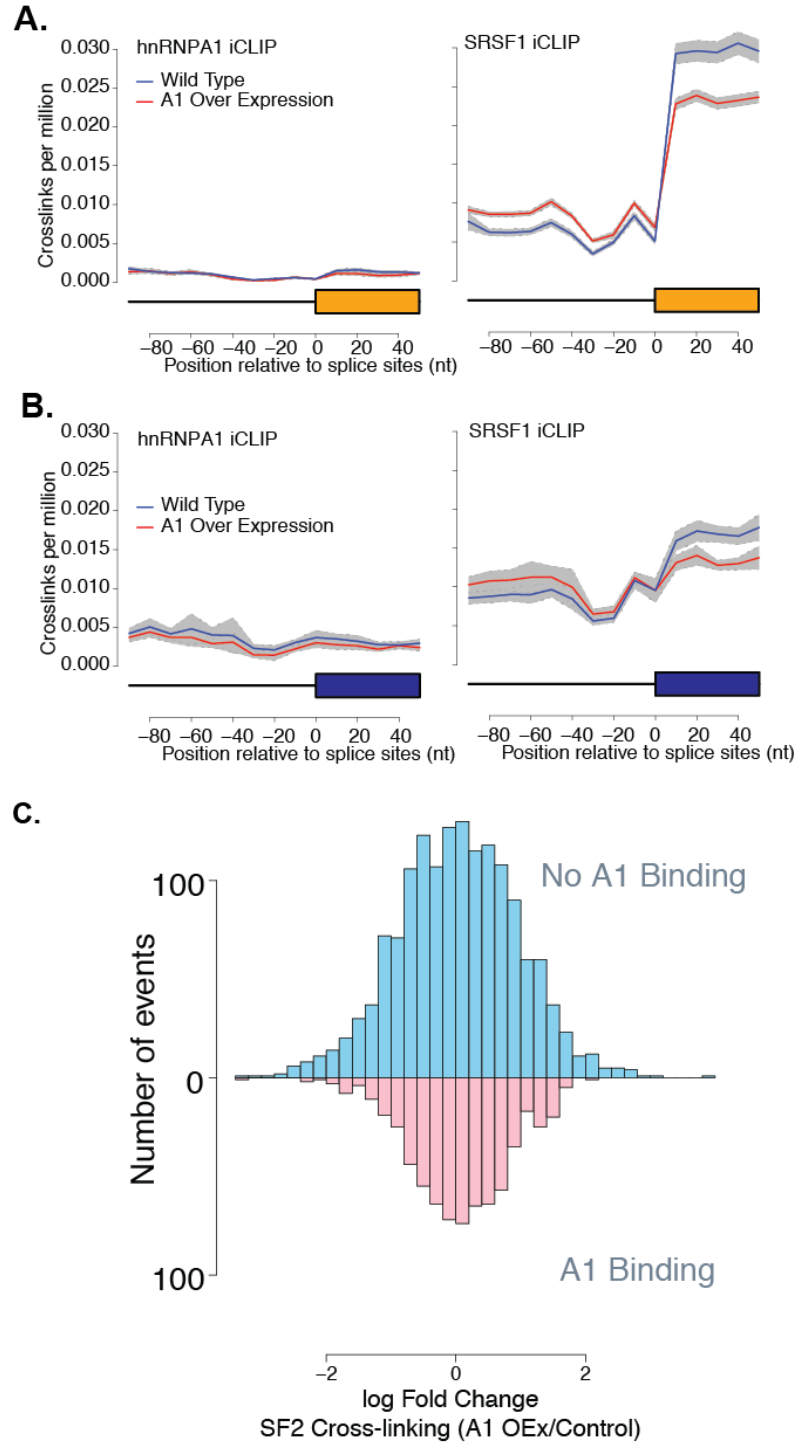

Supplemental Fig. 4

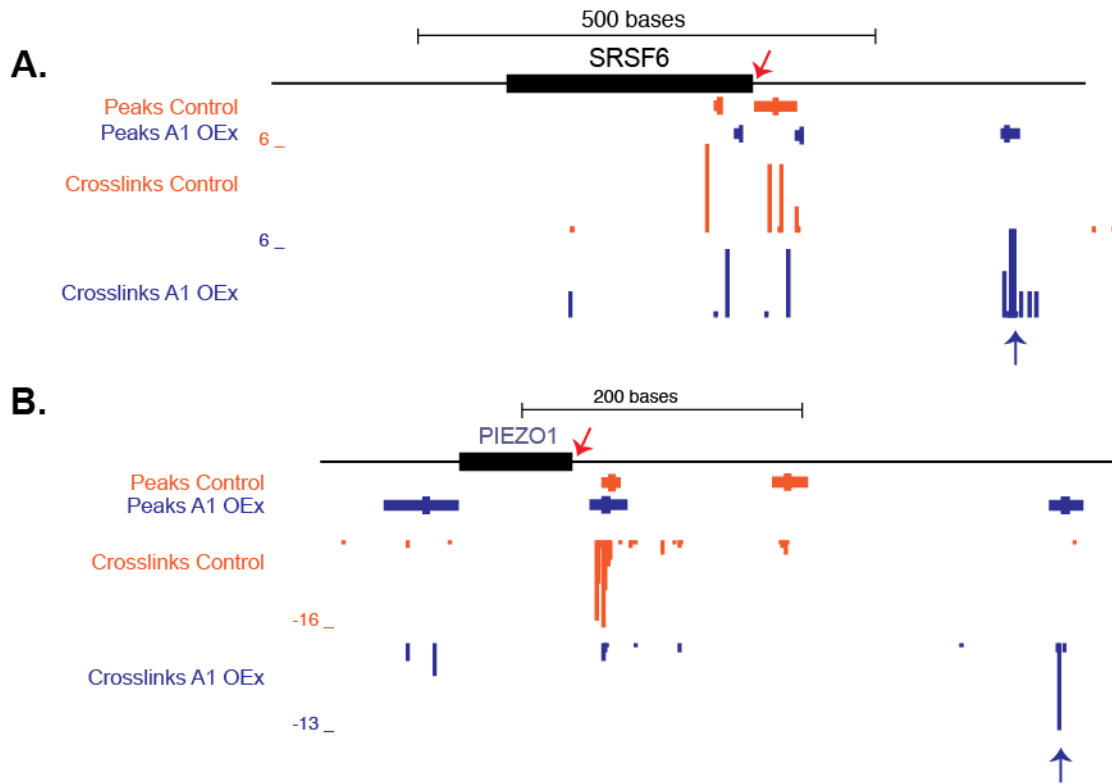

Supplemental Fig. 5.

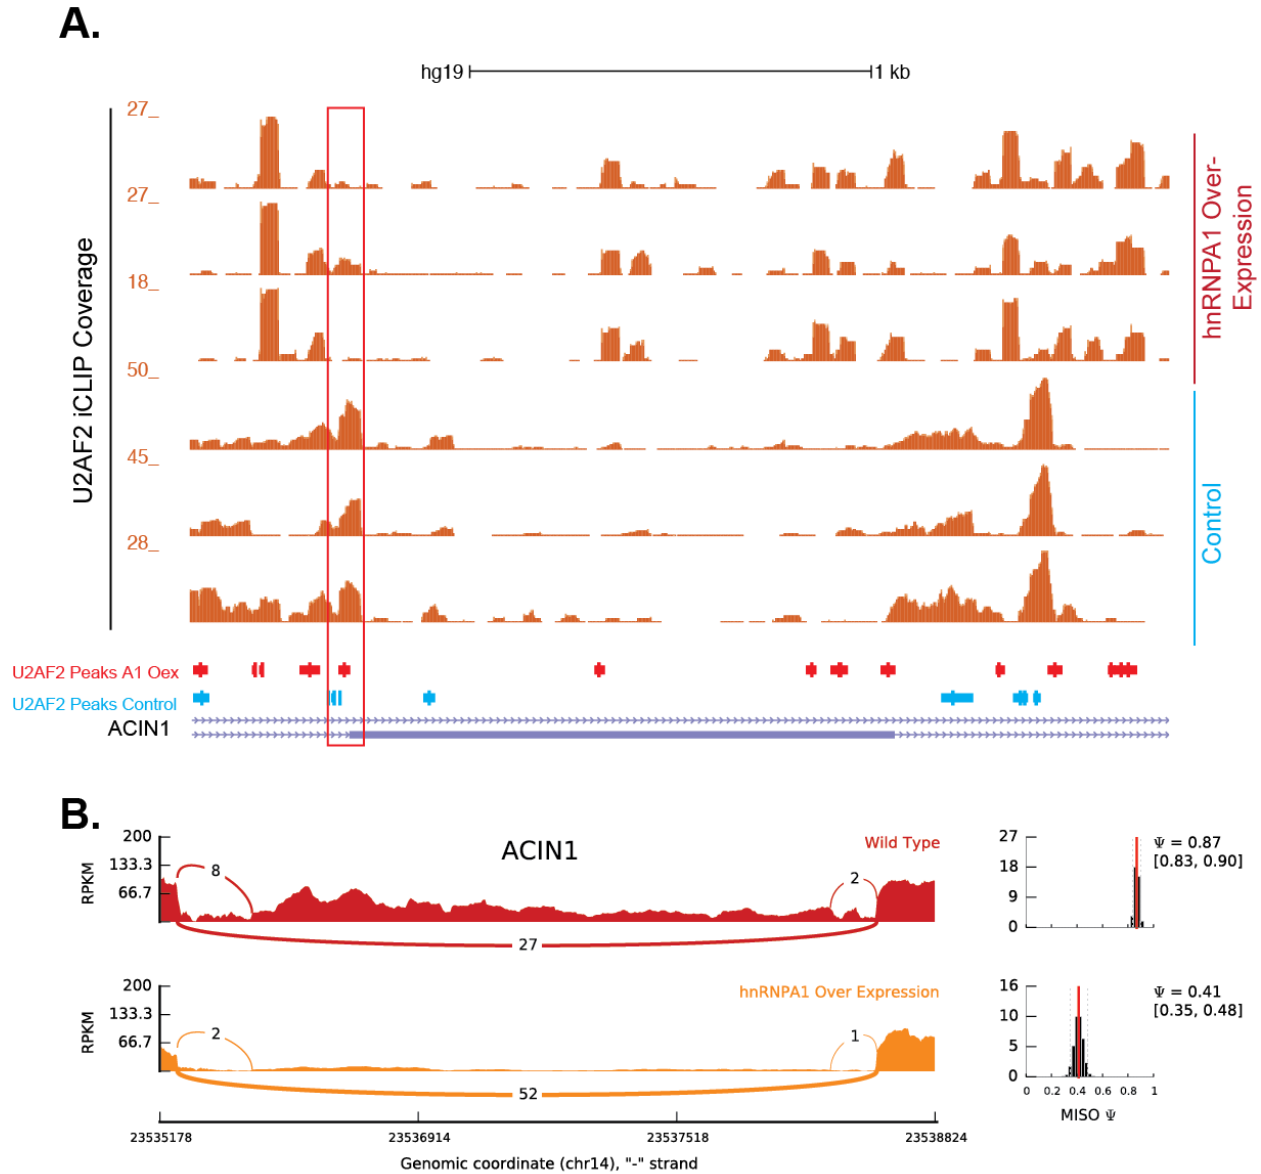

Supplemental Fig. 6

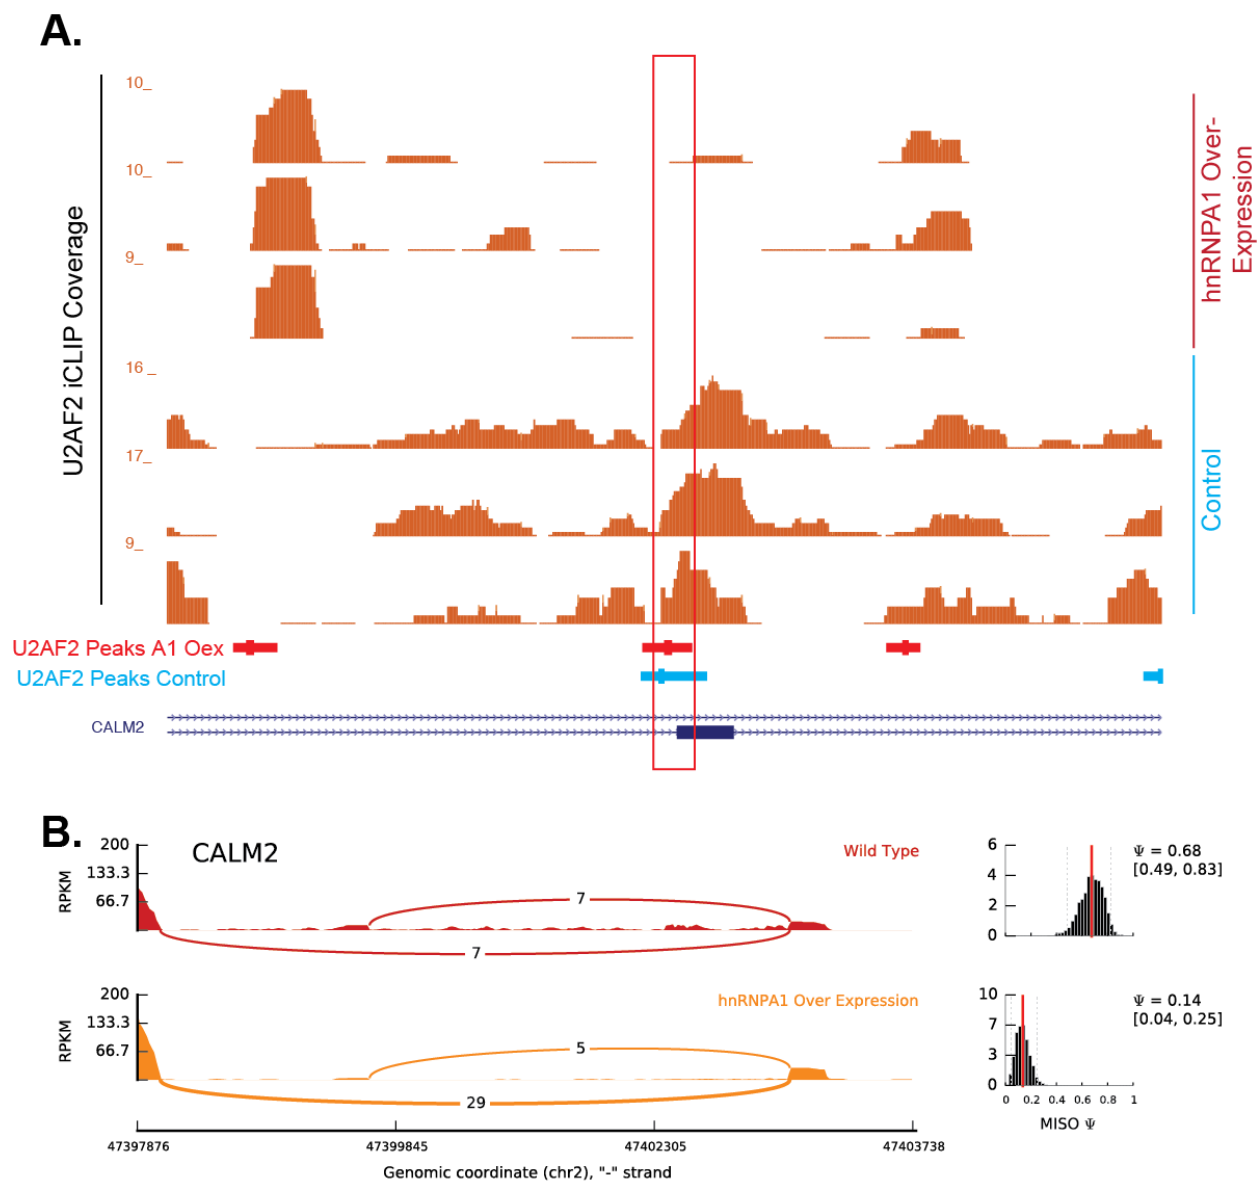

Supplemental Fig. 7

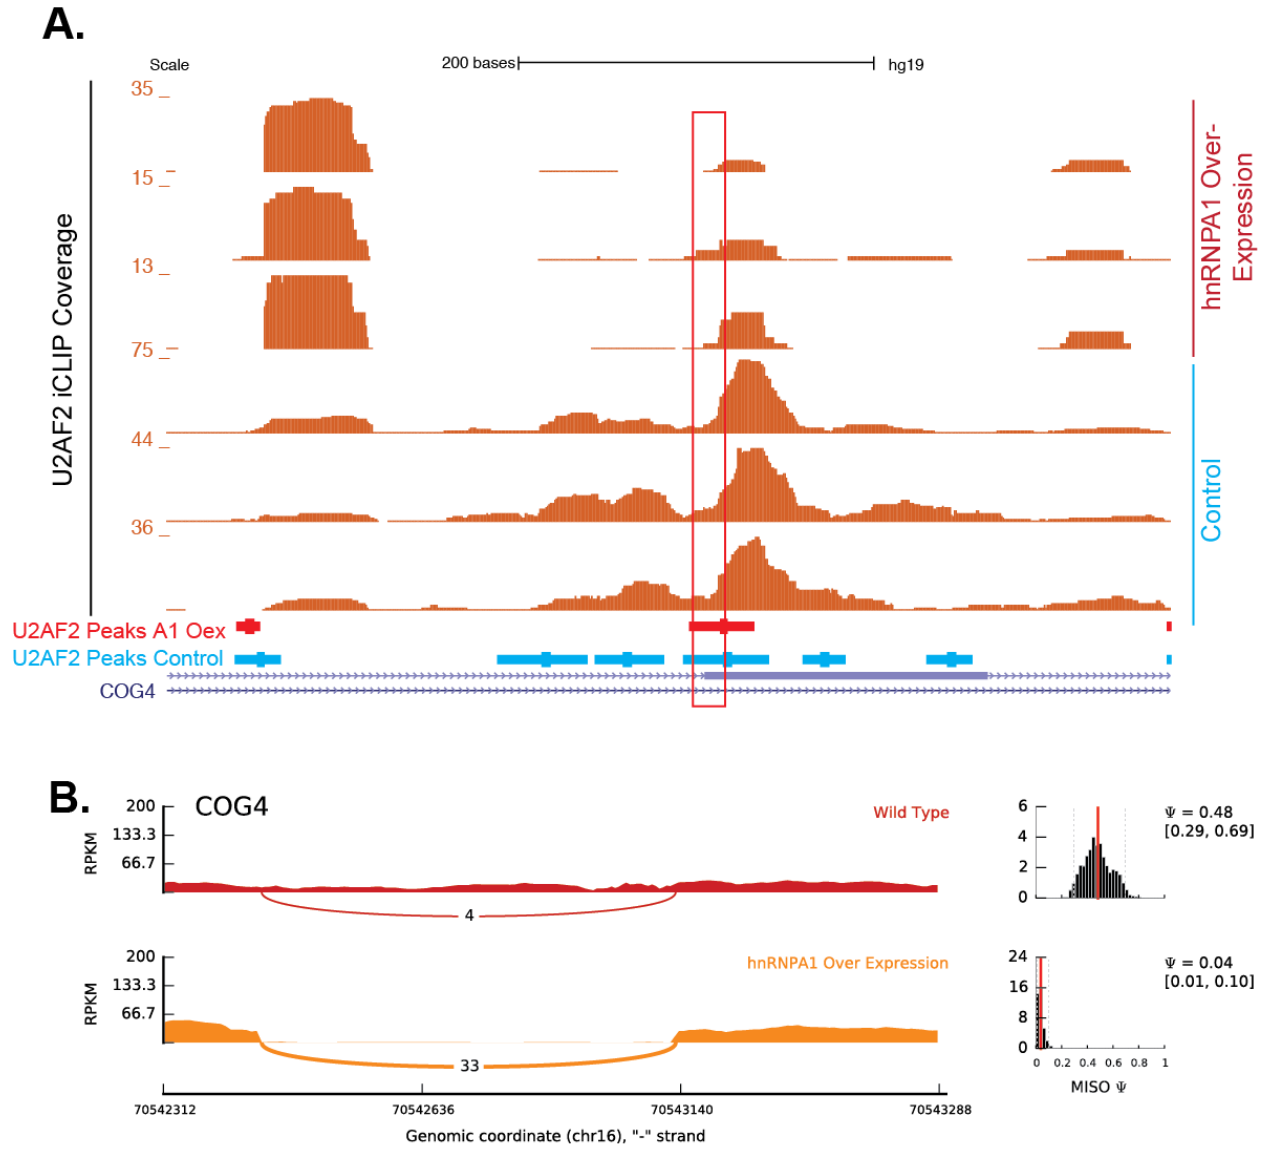

Supplemental Fig. 8



**A.**

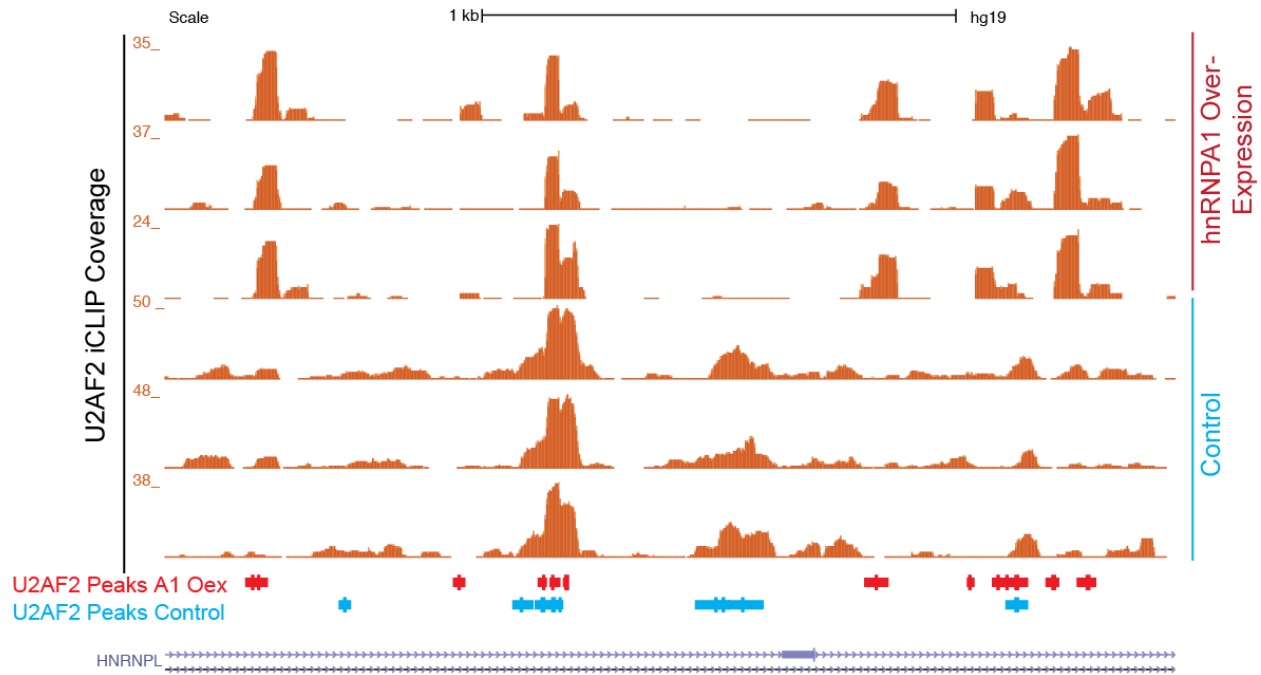

**B.**

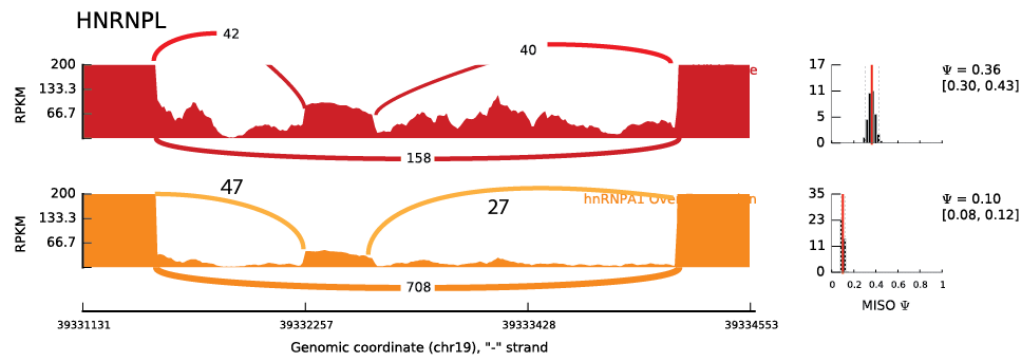

**Supplemental Fig. 9**

**A.**

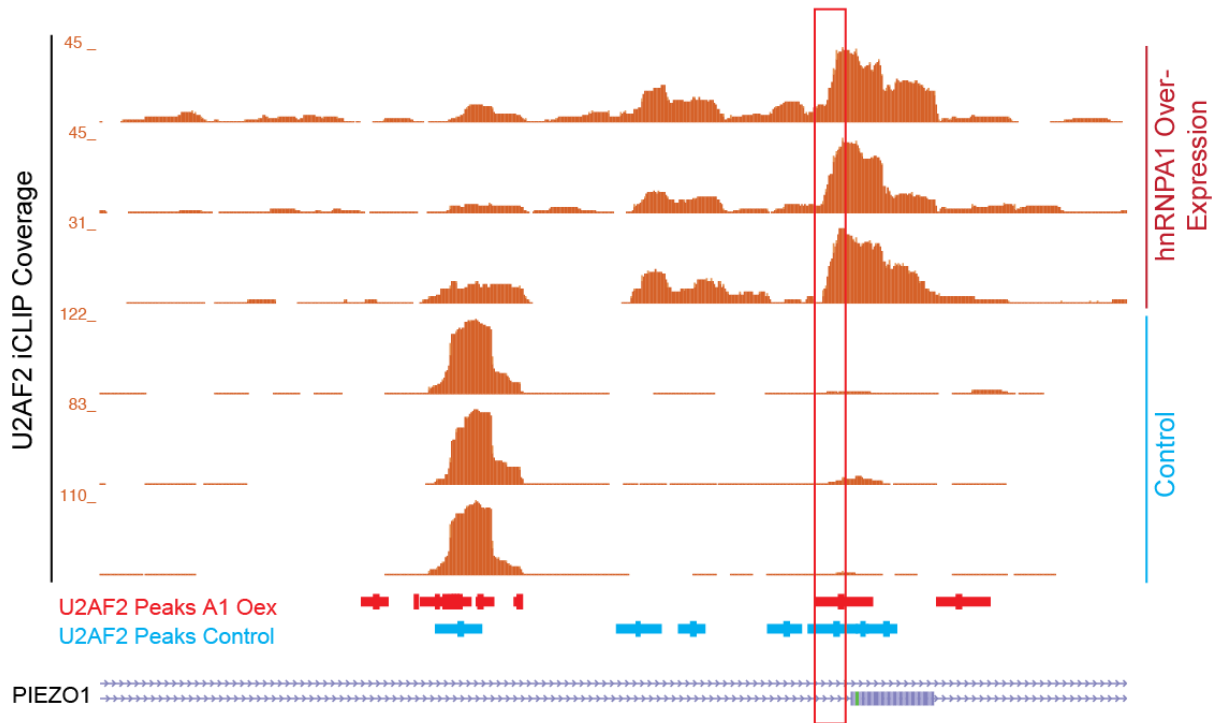

**B.**

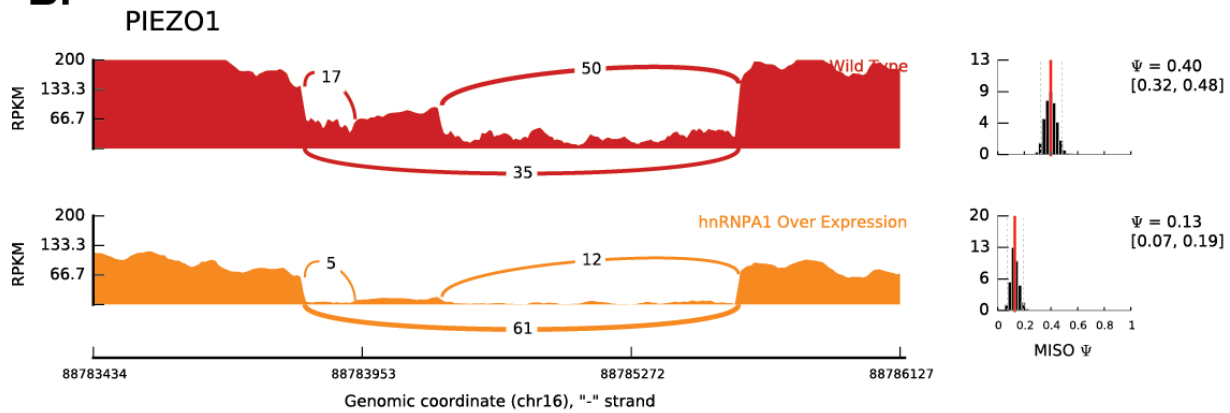

**Supplemental Fig. 10**

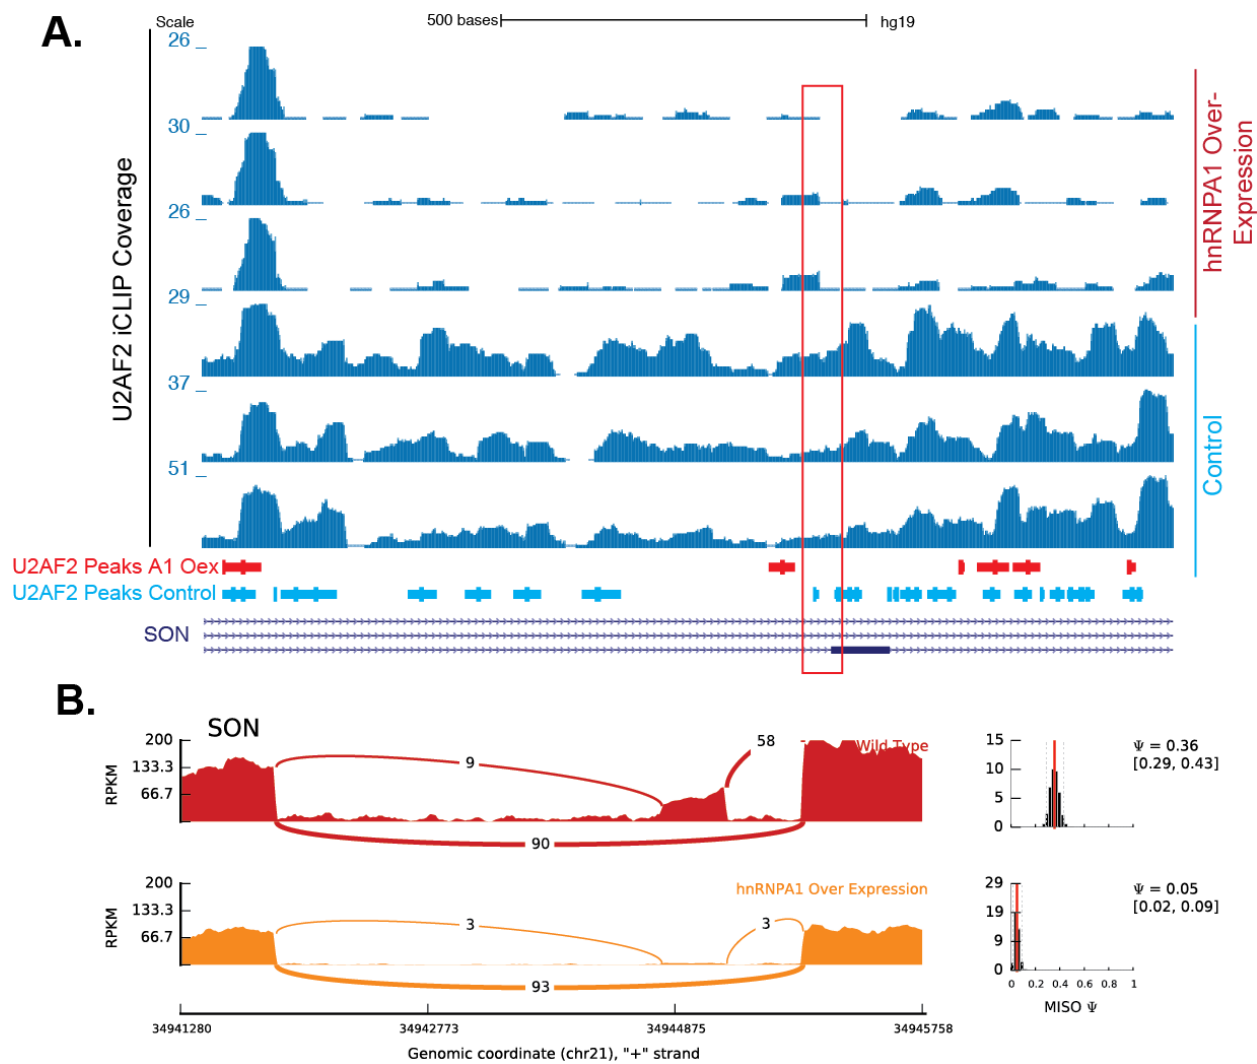

Supplemental Fig. 11

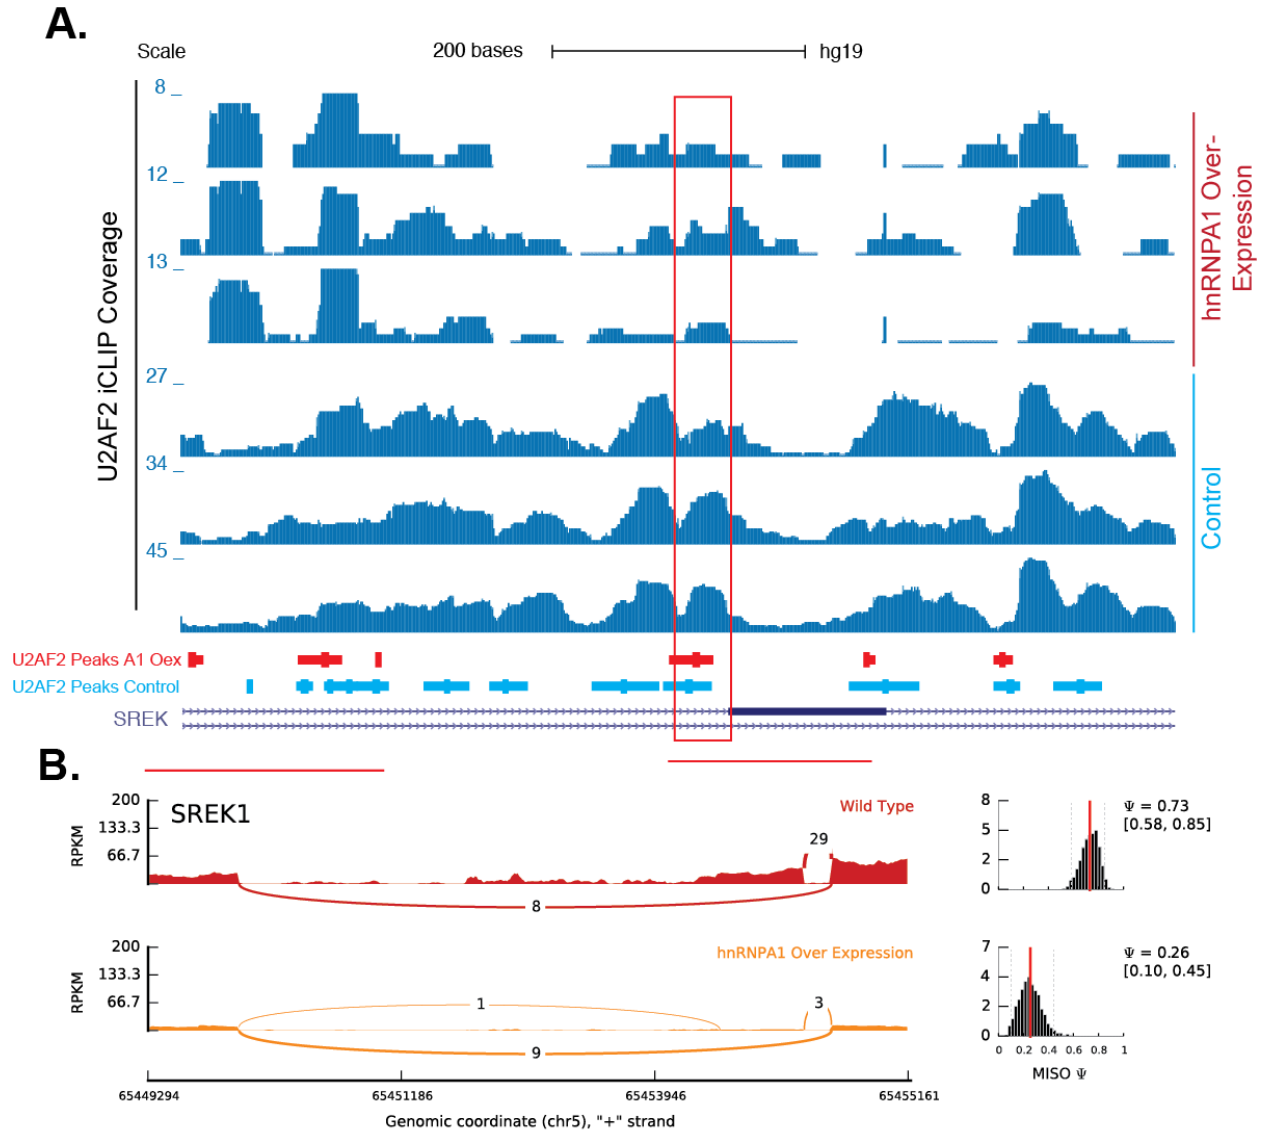

Supplemental Fig. 12

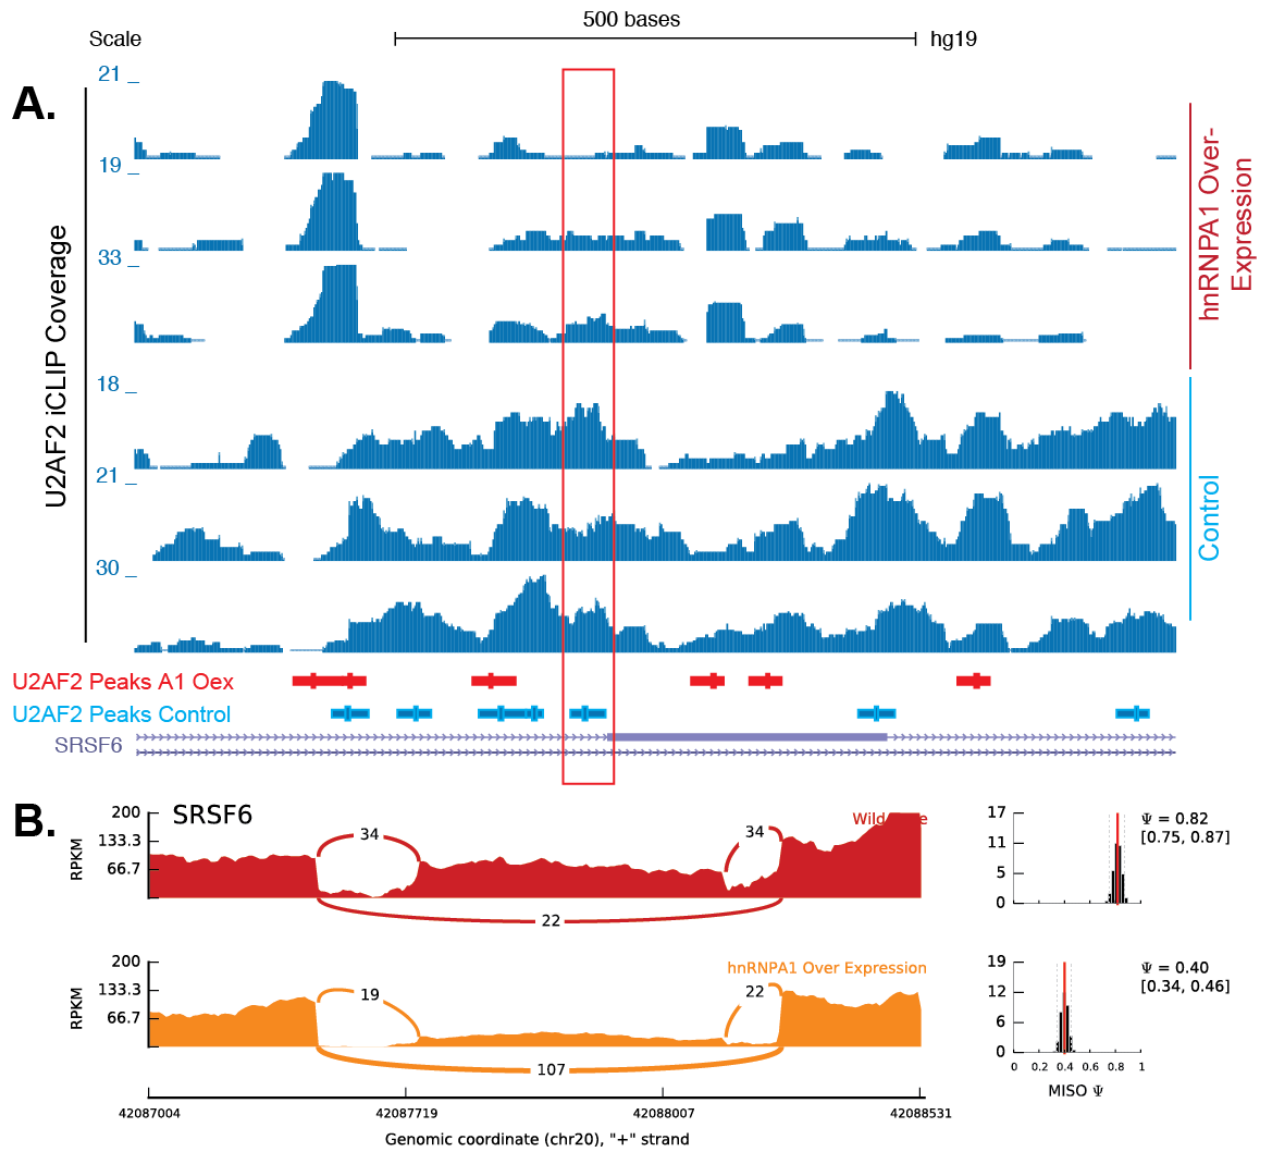

Supplemental Fig. 13

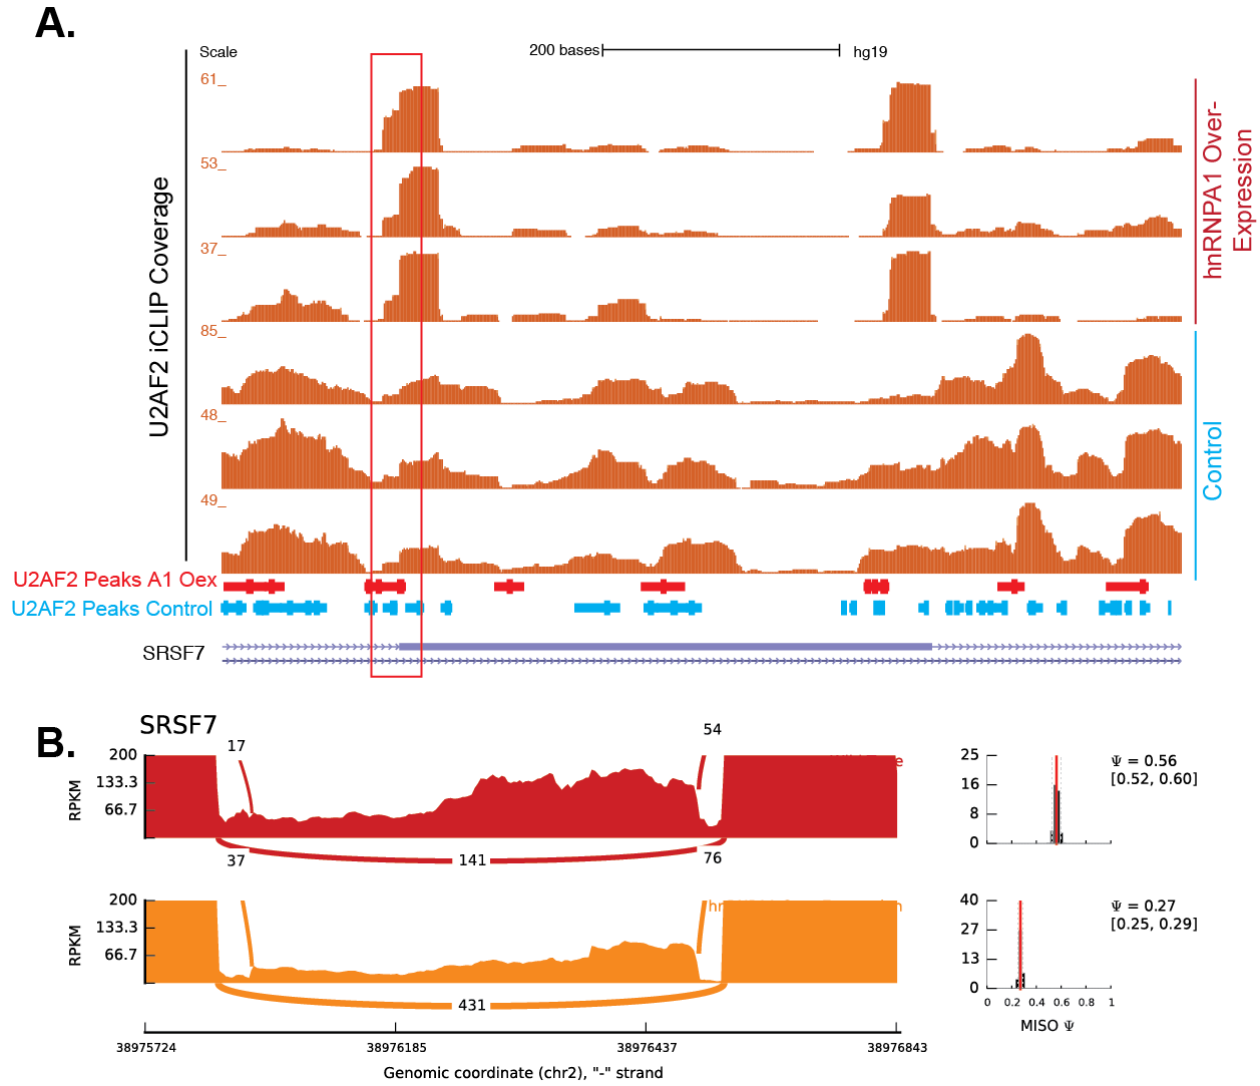

Supplemental Fig. 14

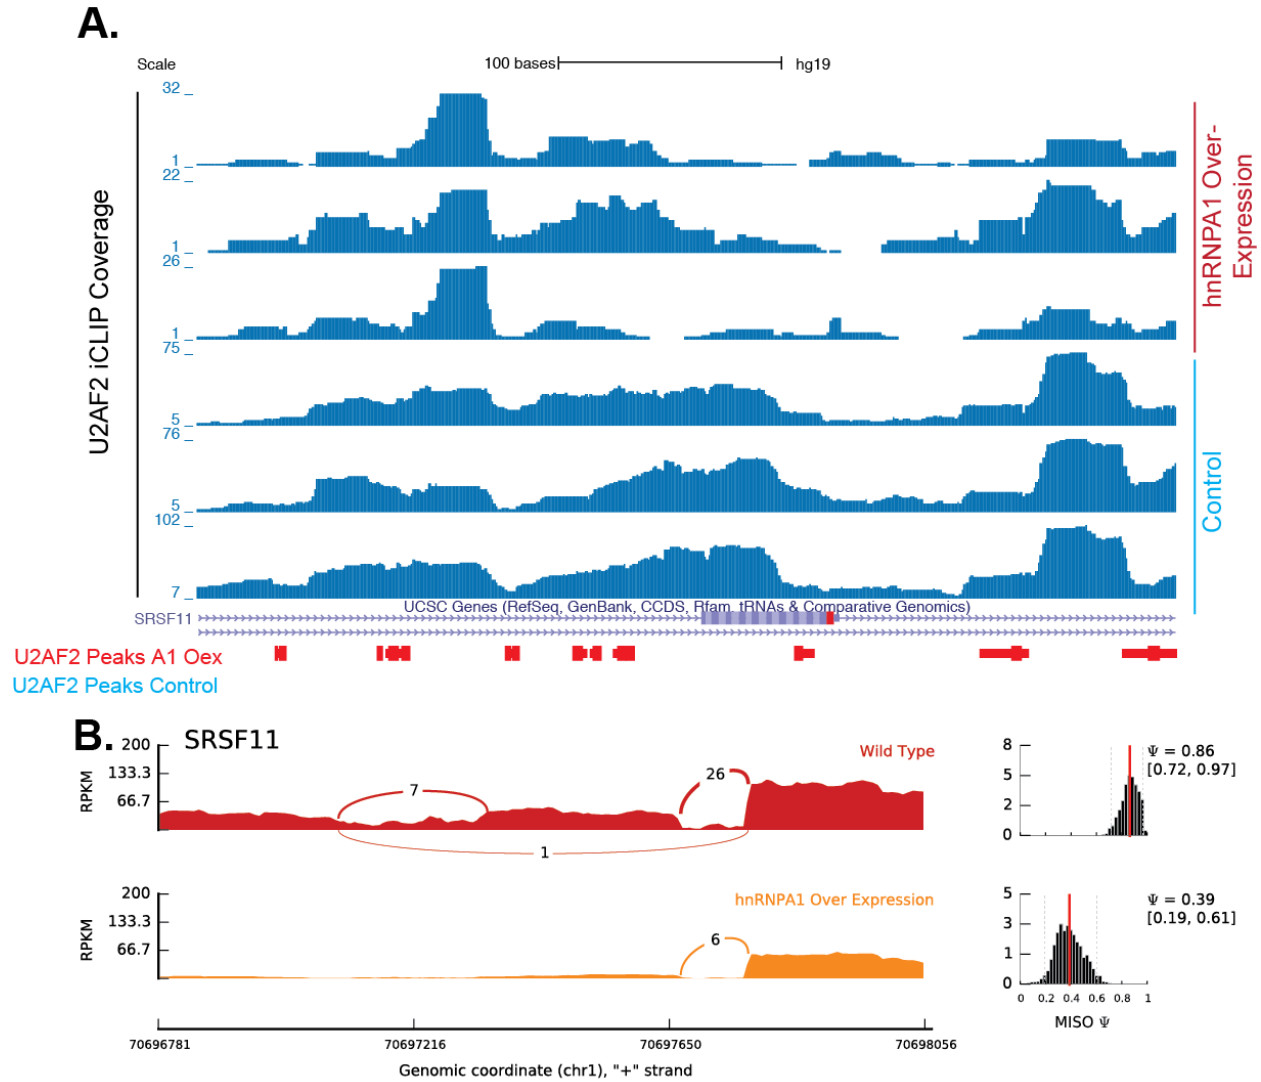

Supplemental Fig. 15

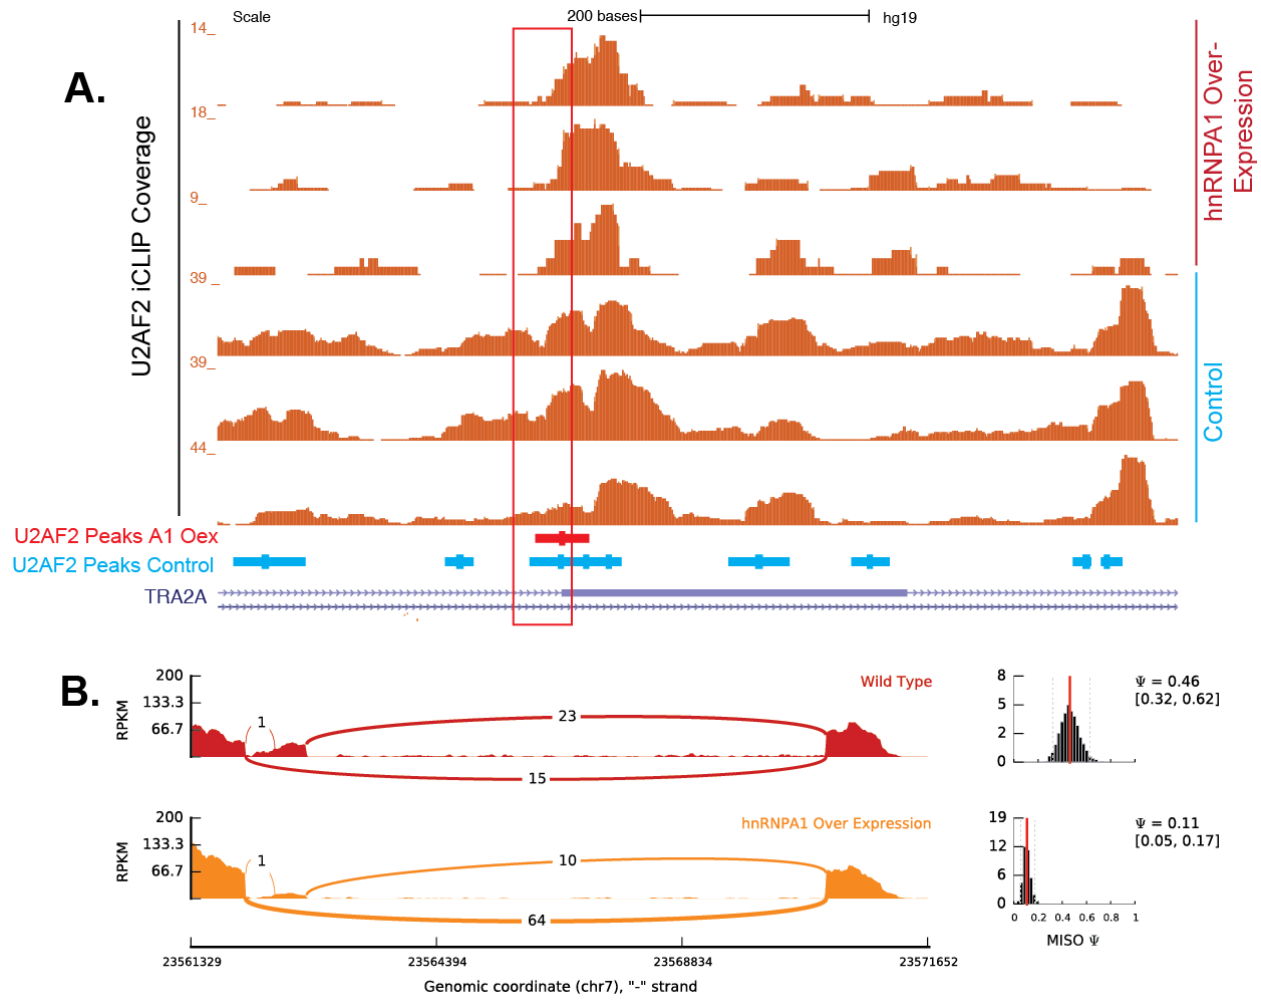

Supplemental Fig. 16



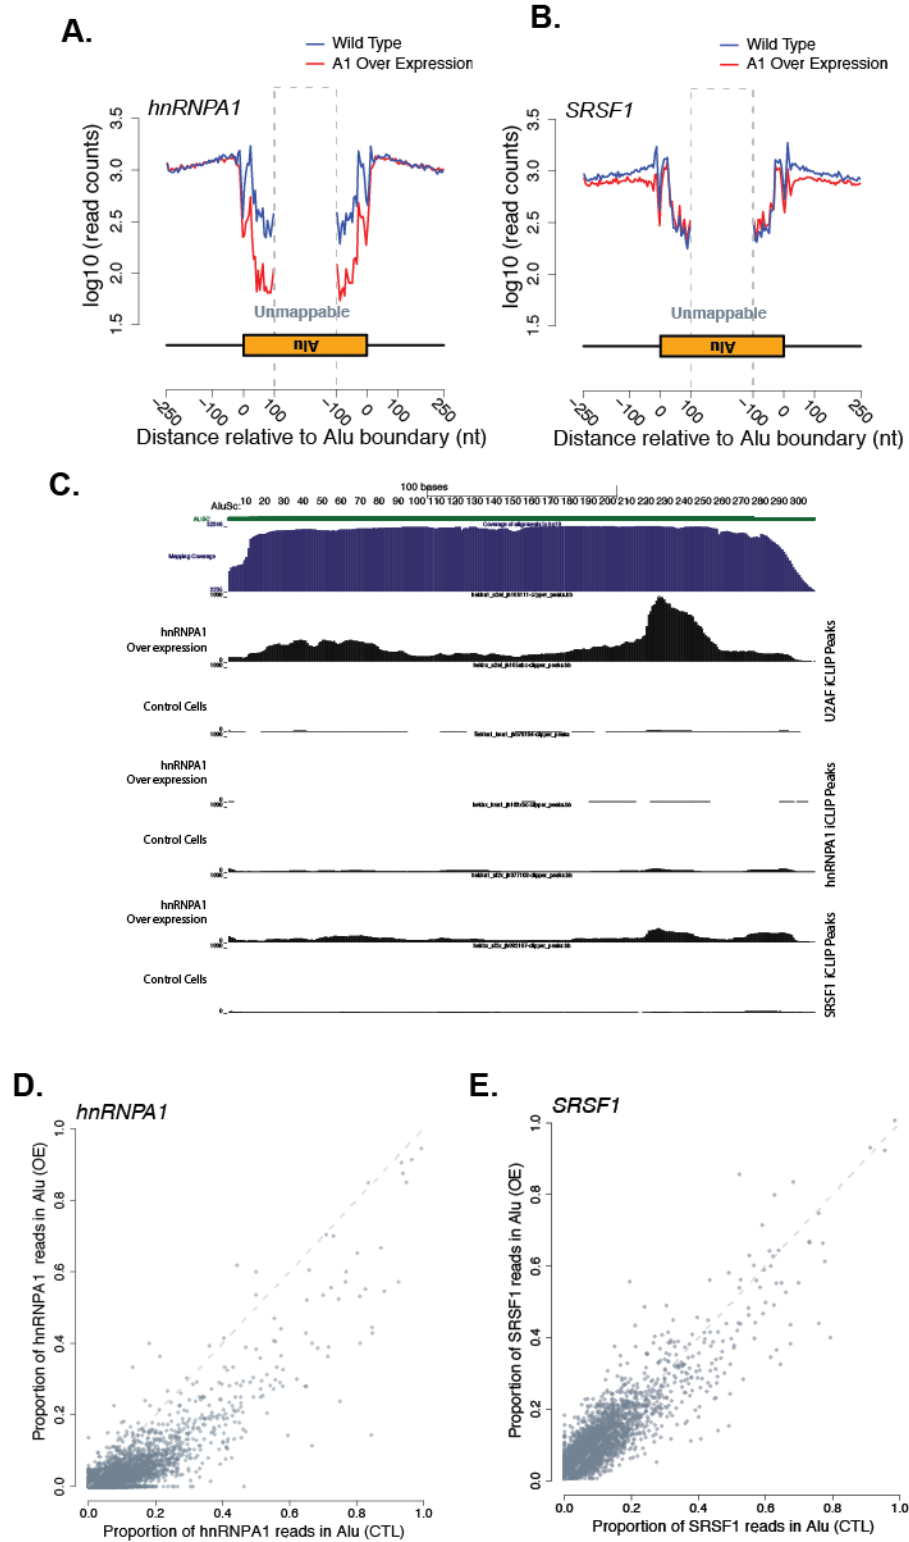

Supplemental Fig. 17

## Supplementary Figure Legends

### **Supplemental Fig 1. Overexpression of hnRNP A1 does not confer appreciable changes in hnRNP C1/C2 expression in HEK293T cells.**

**(A)** Western blot of TREX HEK293T control cells and those containing a tetracycline-inducible T7-tagged version of hnRNP A1 (T7-A1). After 24 h cell lysate was subjected to immunoblotting for hnRNP A1, T7 protein tag, hnRNP C1/C2, and EWS as a loading control. Experiment was performed in duplicate. **(B)** Intracellular distribution of hnRNP C, hnRNP A1, and U2AF2 analyzed by immunofluorescence. Control and T7-hnRNP A1 HEK293T TREX Flp-In were treated with tetracycline, fixed with 4% paraformaldehyde. Fixed cells were stained with anti-hnRNP C (4F4, Santa Cruz Biotechnology), anti-hnRNP A1 (4B10, Santa Cruz Biotechnology), or anti-U2AF2 (MC3, Santa Cruz Biotechnology) antibodies. Cells were subsequently stained with Cy2-conjugated goat anti-mouse antibody and co-stained with DAPI for nuclear reference.

### **Supplemental Fig. 2. Crosslinking immunoprecipitation of hnRNPA1 and SRSF1 under hnRNPA1 modulation.**

**(A)** Summary of iCLIP of hnRNPA1 under control and hnRNPA1 overexpression conditions. Examples of iCLIP autoradiographs for hnRNPA1 under control and overexpression of hnRNPA1. Protein-RNA complex shifts are UV-, antibody- and Micrococcal nuclease-sensitive. Bars denote the region of nitrocellulose blot excised for RNA isolation for iCLIP library preparation. CLIPper analysis of iCLIP RNA distribution for U2AF2 in control and hnRNPA1 overexpression conditions. Top HOMER consensus binding motifs for hnRNPA1 in control and hnRNPA1 overexpression conditions. **(B)** Top left panel, autoradiograph from SRSF1 IP from control cells. Top left panel, autoradiograph from SRSF1 IP from hnRNP A1 over expression cells. Middle left panel, annotation of SRSF1 peaks identified by CLIPPER and consensus motifs identified by HOMER from control cells. Middle right

panel, annotation of SRSF1 peaks identified by CLIPPER and consensus motifs identified by HOMER from hnRNP A1 over expression cells.

**Supplemental Fig. 3. Distribution of hnRNPA1, SRSF1 and U2AF2 peaks relative to splice sites.** The frequency of peaks occurring at different positions relative to splice sites is shown.

**Supplemental Fig 4. Global hnRNP A1 and SRSF1 crosslinking remains constant near 3' splice sites under hnRNPA1 overexpression. (A,B)** Normalized crosslinking distribution for hnRNPA1 (left panel), SRSF1 (right panel) in wild type (blue line) and hnRNPA1 overexpression cell lines (red line) with 95% confidence interval (grey area). Data is divided between constitutive (A) and cassette (B) exons. **(C)** Natural log fold change distribution of SRSF1 within 200bp intron regions near 3' splice sites of cassette exons. Blue bars correspond to annotated alternative splicing events with no evidence of hnRNPA1 crosslinking in either condition and pink represents annotated events with detectable hnRNP A1 crosslinking.

**Supplemental Fig. 5. Examples of hnRNPA1-dependent modulation of U2AF2 crosslinking.** UCSC genome browser examples of two genes SRSF6 (A) and PIEZO1 (B) and iCLIP crosslinking site (5'ends of reads) coverage data for U2AF2 under control and hnRNPA1 overexpression. Alternative splicing changes can be observed in figure 3 (SRSF6) and supplemental figures 10 and 13 (PEIZO1 and SRSF6, respectively).

**Supplemental Fig 6. hnRNPA1-dependent modulation of U2AF2 crosslinking and alternative splicing of ACIN1 locus. (A)** UCSC genome browser of ACIN1 alternative exon and CLIP read coverage data for U2AF2 under control (blue text) and hnRNPA1 overexpression

(red text). Red box highlights region in which U2AF2 is seen to redistribute between two conditions. **(B)** Sashimi plots showing read and junction coverage for ACIN1 gene under wildtype (red) and hnRNPA1 over-expression (orange) conditions. PSI (percent splicing index) values are provided for each condition reflecting inclusion level of exon shown in genome browser (A) image.

**Supplemental Fig 7. hnRNPA1-dependent modulation of U2AF2 crosslinking and alternative splicing of CALM2 locus. (A)** UCSC genome browser of CALM2 alternative exon and CLIP read coverage data for U2AF2 under control (blue text) and hnRNPA1 overexpression (red text). Red box highlights region in which U2AF2 is seen to redistribute between two conditions. **(B)** Sashimi plots showing read and junction coverage for CALM2 gene under wildtype (red) and hnRNPA1 over-expression (orange) conditions. PSI (percent splicing index) values are provided for each condition reflecting inclusion level of exon shown in genome browser (A) image.

**Supplemental Fig 8. hnRNPA1-dependent modulation of U2AF2 crosslinking and alternative splicing of COG4 locus. (A)** UCSC genome browser of COG4 alternative exon and CLIP read coverage data for U2AF2 under control (blue text) and hnRNPA1 overexpression (red text). Red box highlights region in which U2AF2 is seen to redistribute between two conditions. **(B)** Sashimi plots showing read and junction coverage for COG4 gene under wildtype (red) and hnRNPA1 over-expression (orange) conditions. PSI (percent splicing index) values are provided for each condition reflecting inclusion level of exon shown in genome browser (A) image.

**Supplemental Fig 9. hnRNPA1-dependent modulation of U2AF2 crosslinking and alternative splicing of hnRNP L locus. (A)** UCSC genome browser of COG4 alternative exon and CLIP read coverage data for U2AF2 under control (blue text) and hnRNPA1 overexpression

(red text). Red box highlights region in which U2AF2 is seen to redistribute between two conditions. **(B)** Sashimi plots showing read and junction coverage for COG4 gene under wildtype (red) and hnRNPA1 over-expression (orange) conditions. PSI (percent splicing index) values are provided for each condition reflecting inclusion level of exon shown in genome browser (A) image.

**Supplemental Fig 10. hnRNPA1-dependent modulation of U2AF2 crosslinking and alternative splicing of PIEZO1 locus.** **(A)** UCSC genome browser of PIEZO1 alternative exon and CLIP read coverage data for U2AF2 under control (blue text) and hnRNPA1 overexpression (red text). Red box highlights region in which U2AF2 is seen to redistribute between two conditions. **(B)** Sashimi plots showing read and junction coverage for PIEZO1 gene under wildtype (red) and hnRNPA1 over-expression (orange) conditions. PSI (percent splicing index) values are provided for each condition reflecting inclusion level of exon shown in genome browser (A) image.

**Supplemental Fig 11. hnRNPA1-dependent modulation of U2AF2 crosslinking and alternative splicing of SON locus.** **(A)** UCSC genome browser of SON alternative exon and CLIP read coverage data for U2AF2 under control (blue text) and hnRNPA1 overexpression (red text). Red boxes highlight region in which U2AF2 is seen to redistribute between two conditions. **(B)** Sashimi plots showing read and junction coverage for SON gene under wildtype (red) and hnRNPA1 over-expression (orange) conditions. PSI (percent splicing index) values are provided for each condition reflecting inclusion level of exon shown in genome browser (A) image.

**Supplemental Fig 12. hnRNPA1-dependent modulation of U2AF2 crosslinking and alternative splicing of SREK1 locus.** **(A)** UCSC genome browser of SREK1 alternative exon

and CLIP read coverage data for U2AF2 under control (blue text) and hnRNPA1 overexpression (red text). Red boxes highlight region in which U2AF2 is seen to redistribute between two conditions. **(B)** Sashimi plots showing read and junction coverage for SREK1 gene under wildtype (red) and hnRNPA1 over-expression (orange) conditions. PSI (percent splicing index) values are provided for each condition reflecting inclusion level of exon shown in genome browser (A) image.

**Supplemental Fig 13. hnRNPA1-dependent modulation of U2AF2 crosslinking and alternative splicing of SRSF6 locus.** **(A)** UCSC genome browser of SRSF6 alternative exon and CLIP read coverage data for U2AF2 under control (blue text) and hnRNPA1 overexpression (red text). **(B)** Sashimi plots showing read and junction coverage for SRSF6 gene under wildtype (red) and hnRNPA1 over-expression (orange) conditions. PSI (percent splicing index) values are provided for each condition reflecting inclusion level of exon shown in genome browser (A) image.

**Supplemental Fig 14. hnRNPA1-dependent modulation of U2AF2 crosslinking and alternative splicing of SRSF7 locus.** **(A)** UCSC genome browser of SRSF7 alternative exon and CLIP read coverage data for U2AF2 under control (blue text) and hnRNPA1 overexpression (red text). **(B)** Sashimi plots showing read and junction coverage for SRSF7 gene under wildtype (red) and hnRNPA1 over-expression (orange) conditions. PSI (percent splicing index) values are provided for each condition reflecting inclusion level of exon shown in genome browser (A) image.

**Supplemental Fig 15. hnRNPA1-dependent modulation of U2AF2 crosslinking and alternative splicing of SRSF11 locus.** **(A)** UCSC genome browser of SRSF11 alternative exon and CLIP read coverage data for U2AF2 under control (blue text) and hnRNPA1 overexpression (red text). **(B)** Sashimi plots showing read and junction coverage for SRSF11 gene under

wildtype (red) and hnRNPA1 over-expression (orange) conditions. PSI (percent splicing index) values are provided for each condition reflecting inclusion level of exon shown in genome browser (A) image.

**Supplemental Fig 16. hnRNPA1-dependent modulation of U2AF2 crosslinking and alternative splicing of TRA2A locus. (A)** UCSC genome browser of TRA2A alternative exon and CLIP read coverage data for U2AF2 under control (blue text) and hnRNPA1 overexpression (red text). **(B)** Sashimi plots showing read and junction coverage for TRA2A gene under wildtype (red) and hnRNPA1 over-expression (orange) conditions. PSI (percent splicing index) values are provided for each condition reflecting inclusion level of exon shown in genome browser (A) image.

**Supplemental Fig 17. Global hnRNP A1 and SRSF1 crosslinking near antisense *Alu* elements under control and hnRNPA1 overexpression conditions. (A,B)** Aggregated read counts on *Alu* elements and nearby regions for hnRNPA1 (A) and SRSF1 (B). Blue represents wild-type binding of the given RNA binding protein and red represents hnRNP A1 overexpression of the log<sub>10</sub> number of iCLIP read counts across all antisense-*Alu* elements. **(C)** Distribution of aggregated U2AF2 (top), hnRNPA1 (middle), and SRSF1 (bottom) iCLIP read counts on *Alu* subtype *AluSc* under control and hnRNPA1 overexpression conditions. **(D,E)** Effects of hnRNP A1 overexpression on the proportion of hnRNP A1 and SRSF1 crosslinking sites in *Alu* RNA elements. Scatter plot of all human cassette exons measuring the proportion of hnRNP A1 and SRSF1 iCLIP crosslinking sites found within *Alu* elements relative to the total number of crosslinks observed throughout the alternative event.

## Supplemental Text:

### Link UCSC Genome Browser session with RNA-seq coverage, iCLIP coverage and peaks

[http://genome.ucsc.edu/cgi-bin/hgTracks?hgS\\_doOtherUser=submit&hgS\\_otherUserName=jeremyrsanford&hgS\\_otherUserSessionName=Howard%20et%20al](http://genome.ucsc.edu/cgi-bin/hgTracks?hgS_doOtherUser=submit&hgS_otherUserName=jeremyrsanford&hgS_otherUserSessionName=Howard%20et%20al)

### iCLIP Coverage track descriptions

#### plus strand

hekha1\_hna1\_jh104a ih1 rdc1 1p cov = "hnRNPA1 iCLIP from hnRNPA1 overexpression cells" replicate 1

hekha1\_hna1\_jh104b ih1 rdc1 1p cov = "hnRNPA1 iCLIP from hnRNPA1 overexpression cells" replicate 2

hektrx\_hna1\_jh103b ih1 rdc1 1p cov = "hnRNPA1 iCLIP from control cells" replicate 1

hektrx\_hna1\_jh103c ih1 rdc1 1p cov = "hnRNPA1 iCLIP from control cells" replicate 2

hekha1\_sf2x\_jh108a ih1 rdc1 1p cov = "SRSF1 iCLIP from hnRNPA1 overexpression cells" replicate 1

hekha1\_sf2x\_jh108b ih1 rdc1 1p cov = "SRSF1 iCLIP from hnRNPA1 overexpression cells" replicate 2

hekha1\_sf2x\_jh108c ih1 rdc1 1p cov = "SRSF1 iCLIP from hnRNPA1 overexpression cells" replicate 3

hektrx\_sf2x\_jh107a ih1 rdc1 1p cov = "SRSF1 iCLIP from control cells" replicate 1

hektrx\_sf2x\_jh107b ih1 rdc1 1p cov = "SRSF1 iCLIP from control cells" replicate 2

hektrx\_sf2x\_jh107c ih1 rdc1 1p cov = "SRSF1 iCLIP from control cells" replicate 3

hekha1\_u2af\_jh106a ih1 rdc1 1p cov = "U2AF2 iCLIP from hnRNPA1 overexpression cells" replicate 1

hekha1\_u2af\_jh106b ih1 rdc1 1p cov = "U2AF2 iCLIP from hnRNPA1 overexpression cells" replicate 2

hekha1\_u2af\_jh106c ih1 rdc1 1p cov = "U2AF2 iCLIP from hnRNPA1 overexpression cells" replicate 3

hektrx\_u2af\_jh105a ih1 rdc1 1p cov = "U2AF2 iCLIP from control cells" replicate 1

hektrx\_u2af\_jh105b ih1 rdc1 1p cov = "U2AF2 iCLIP from control cells" replicate 2

hektrx\_u2af\_jh105c ih1 rdc1 1p cov = "U2AF2 iCLIP from control cells" replicate 3

#### Minus strand

hekha1\_hna1\_jh104a ih1 rdc1 1m cov = "hnRNPA1 iCLIP from hnRNPA1 overexpression cells" replicate 1

hekha1\_hna1\_jh104b ih1 rdc1 1m cov = "hnRNPA1 iCLIP from hnRNPA1 overexpression cells" replicate 2

hektrx\_hna1\_jh103b ih1 rdc1 1m cov = "hnRNPA1 iCLIP from control cells" replicate 1

hektrx\_hna1\_jh103c ih1 rdc1 1m cov = "hnRNPA1 iCLIP from control cells" replicate 2

hekha1\_sf2x\_jh108a ih1 rdc1 1m cov = "SRSF1 iCLIP from hnRNPA1 overexpression cells" replicate 1

hekha1\_sf2x\_jh108b ih1 rdc1 1m cov = "SRSF1 iCLIP from hnRNPA1 overexpression cells" replicate 2

hekha1\_sf2x\_jh108c ih1 rdc1 1m cov = "SRSF1 iCLIP from hnRNPA1 overexpression cells" replicate 3

hektrx\_sf2x\_jh107a ih1 rdc1 1m cov = "SRSF1 iCLIP from control cells" replicate 1

hektrx\_sf2x\_jh107b ih1 rdc1 1m cov = "SRSF1 iCLIP from control cells" replicate 2



hektrx\_sf2x\_jh107c ih1 rdc1 1m cov = "SRSF1 iCLIP from control cells" replicate 3  
hekha1\_u2af\_jh106a ih1 rdc1 1m cov = "U2AF2 iCLIP from hnRNPA1 overexpression cells" replicate 1  
hekha1\_u2af\_jh106b ih1 rdc1 1m cov = "U2AF2 iCLIP from hnRNPA1 overexpression cells" replicate 2  
hekha1\_u2af\_jh106c ih1 rdc1 1m cov = "U2AF2 iCLIP from hnRNPA1 overexpression cells" replicate 3  
hektrx\_u2af\_jh105a ih1 rdc1 1m cov = "U2AF2 iCLIP from control cells" replicate 1  
hektrx\_u2af\_jh105b ih1 rdc1 1m cov = "U2AF2 iCLIP from control cells" replicate 2  
hektrx\_u2af\_jh105c ih1 rdc1 1m cov = "U2AF2 iCLIP from control cells" replicate 3

### **CLIPper Peak Track descriptions**

hekha1\_hna1\_jh078104 P2 clipper\_pk = Peaks called from hnRNPA1 iCLIP from hnRNPA1 over-expression cells  
hektrx\_hna1\_jh103xbc P2 clipper\_pk = Peaks called from hnRNPA1 iCLIP from control cells  
hekha1\_sf2x\_jh077108 P2 clipper\_pk = Peaks called from SRSF1 iCLIP from hnRNPA1 over-expression cells  
hektrx\_sf2x\_jh082107 P2 clipper\_pk = Peaks called from SRSF1 iCLIP from control cells  
hekha1\_u2af\_jh106111 P2 clipper\_pk = Peaks called from U2AF2 iCLIP from hnRNPA1 over-expression cells  
hektrx\_u2af\_jh105abc P2 clipper\_pk = Peaks called from U2AF2 iCLIP from control cells

### **RNA-Seq Coverage Tracks**

hekha1\_clip\_ti\_jh45 ih1 rd1 xpe 0b cov = RNA-seq from hnRNP over-expression cells replicate 1  
hekha1\_clip\_ti\_jh46 ih1 rd1 xpe 0b cov = RNA-seq from hnRNP over-expression cells replicate 2  
hekha1\_clip\_tn\_jh43 ih1 rd1 xpe 0b cov = RNA-seq from control cells replicate 1  
hekha1\_clip\_tn\_jh44 ih1 rd1 xpe 0b cov = RNA-seq from control cells replicate 2
